# Supplementary material for: Effectiveness and Tolerability of Different Recommended Doses of PPIs and H2RAs in GERD: Network Meta-Analysis and GRADE system
Source: PubMed Central journal article supplement (PMC5244481; doi:10.1038/srep41021), 2017-01-19
Supplement: srep41021-s1.pdf [file srep41021-s1.pdf]

## Supplementary information

### Effectiveness and Tolerability of Different Recommended Doses of PPIs and H<sub>2</sub>RAs in GERD: Network Meta-Analysis and GRADE System

Chao Zhang<sup>1</sup>, Joey S.W. Kwong<sup>2</sup>, Rui-Xia Yuan<sup>1,3</sup>, Hao Chen<sup>4</sup>, Chang Xu<sup>5</sup>, Yi-Pin Wang<sup>1</sup>,  
Gong-Li Yang<sup>6</sup>, Jin-Zhu Yan<sup>1</sup>, Le Peng<sup>1</sup>, Xian-Tao Zeng<sup>1</sup>, Hong Weng<sup>1</sup>, Jie Luo<sup>1</sup>, Yu-Ming Niu<sup>1,6</sup>

<sup>1</sup>Center for Evidence-Based Medicine and Clinical Research, Taihe Hospital, Hubei University of Medicine, Shiyan 442000, Hubei Province, China; <sup>2</sup>Chinese Cochrane Center, Chinese Evidence-Based Medicine Center, West China Hospital, Sichuan University, Chengdu 610041, Sichuan Province, China; <sup>3</sup>Department of Epidemiology and Biostatistics, School of Public Health, Wuhan University and Global Health Institute, Wuhan University, Wuhan 430000, Hubei Province, China; <sup>4</sup>Center for Evidence-Based Medicine, Nanjing University of Chinese Medicine, Nanjing 210000, Jiangsu Province, China; <sup>5</sup>Department of Urology, Zhongnan Hospital of Wuhan University, Wuhan University, Wuhan 430000, Hubei Province, China; <sup>6</sup>Department of Gastroenterology, Taihe Hospital, Hubei University of Medicine, Shiyan 442000, Hubei Province, China.

## **Supplementary Appendix S1**

### **Appendix S1. Search strategies**

## Supplementary Appendix S1

### Search strategies

We will search the electronic database included the PubMed, Embase, Scopus, and the Cochrane Library published up to 1 Sep 2016, then addition to search the ClinicalTrials.gov and FDA website as supplement. Follow, we will provide the search strategies of PubMed electronic database.

### PubMed:

#1 Gastroesophageal Reflux[mh]

#2 Gastric Acid Reflux

#3 Esophageal Reflux

#4 GERD

#5 Gastro-oesophageal Reflux

#6 Acid reflux

#7 Reflux

#8 RE

#9 Nonerosive reflux oesophagitis

#10 NERD

#11 #1 OR #2 OR #3 OR #4 OR #5 OR #6 OR #7 OR #8 OR #9 OR #10

#12 Proton pump inhibitors

#13 Esomeprazole

#14 Nexium

#15 #13 OR #14

#16 Lansoprazole

#17 2-(((3-Methyl-4-(2,2,2-trifluoroethoxy)-2-pyridyl)methyl)sulfinyl)benzimidazole

#18 Bamalite

#19 Lansol

#20 Lanzor

#21 Prezal

#22 Monolitum

#23 Opiren

#24 Prevacid

#25 Ogastro

#26 Pro Ulco

#27 Promeco

#28 Takepron

#29 Ulpax

#30 Zoton

#31 AG 1749

#32 AG-1749

#33 AG1749

#34 Agopton

#35 Ogast

#36 #17 OR #18 OR #19 OR #20 OR #21 OR #22 OR #23 OR #24 OR #25 OR #26 OR #27 OR  
#28 OR #29 OR #30 OR #31 OR #32 OR #33 OR #34 OR #35

#37 Omeprazole

#38 Prilosec

#39 H 168-68

#40 H 168 68

#41 H 16868

#42 #37 OR #38 OR #39 OR #40 OR #41

#43 Pantoprazole

#44 SK and F 96022

#45 SKF-96022

#46 SK and F-96022

#47 Protonix

#48 BY 1023

#49 BY-1023

#50 #43 OR #44 OR #45 OR #46 OR #47 OR #48 OR #49

#51 Rabeprazole

#52 2-((4-(3-methoxypropoxy)-3-methylpyridin-2-yl)methylsulfinyl)-1H-benzimidazole

#53 Dexrabeprazole

#54 E 3810

#55 E3810

#56 Pariet

#57 Aciphex

# 58 LY-307640

#59 LY 307640

#60 LY307640

#61 #51 OR #52 OR #53 OR #54 OR #55 OR #56 OR #57 OR #58 OR #59 OR #60

#62 Histamine H2 antagonists

#63 Receptor Blockaders, H2

#64 Blockaders, Histamine H2 Receptor

#65 Histamine H2 Receptor Blockaders

#66 Histamine H2 Blockers

#67 Blockers, Histamine H2

#68 H2 Blockers, Histamine

#69 Receptor Antagonists, Histamine H2

#70 Histamine H2 Receptor Antagonists

#71 Antagonists, Histamine H2

#72 H2 Antagonists, Histamine

#73 H2 Receptor Blockaders

#74 Blockaders, H2 Receptor

#75 Antihistaminics, H2

#76 H2 Antihistaminics

#77 H2RAs

#78 #62 OR #63 OR #64 OR #65 OR #66 OR #67 OR #68 OR #69 OR #70 OR #71 OR #72 OR

#73 OR #74 OR #75 OR #76 OR #77  
#79 Cimetidine  
#80 Eureceptor  
#81 Altramet  
#82 SK and F-92334  
#83 SK and F 92334  
#84 SK and F92334  
#85 SKF-92334  
#86 SKF 92334  
#87 SKF92334  
#88 Tagamet  
#89 Biomet  
#90 Histodil  
#91 Biomet400  
#92 N-Cyano-N'-methyl-N''-(2-(((5-methyl-1H-imidazol-4-yl)methyl)thio)ethyl) guanidine  
#93 #79 OR #80 OR #81 OR #82 OR #83 OR #84 OR #85 OR #86 OR #87 OR #88 OR #89 OR  
#90 OR #91 OR #92  
#94 Famotidine  
#95 YM-11170  
#96 YM 11170  
#97 YM11170  
#98 Pepcid  
#99 Famotidine Hydrochloride  
#100 MK-208  
#101 MK 208  
#102 MK208  
#103 #94 OR #95 OR #96 OR #97 OR #98 OR #99 OR #100 OR #101 OR #102  
#104 Nizatidine  
#105  
N-(2-(((2-((Dimethylamino)methyl)-4-thiazolyl)methyl)thio)ethyl)-N'-methyl-2-nitro-1,1-ethene#10  
0 nediamine  
#106 LY-139037  
#107 LY 139037  
#108 LY139037  
#109 Axid  
#110 #104 OR #105 OR #106 OR #107 OR #108 OR #109  
#111 Ranitidine  
#112  
N(2-(((5-((Dimethylamino)methyl)-2-furanyl)methyl)thio)ethyl)-N'-methyl-2-nitro-1,1-ethenedia  
mine  
#113 Ranitidin  
#114 Biotidin  
#115 Ranisen  
#116 Sostril

#117 Zantac  
#118 Zantic  
#119 AH-19065  
#120 AH 19065  
#121 AH19065  
#121 #111 OR #112 OR #113 OR #114 OR #115 OR #116 OR #117 OR #118 OR #119 OR #120  
OR #121  
#122 #12 OR #15 OR #36 OR #42 OR #50 OR #61 OR #78 OR #93 OR #103 OR #110 OR #121  
#123 randomized controlled trial [pt]  
#124 controlled clinical trial [pt]  
#125 randomized controlled trials [mh]  
#126 random allocation [mh]  
#127 double-blind method [mh]  
#128 single-blind method [mh]  
#129 clinical trial [pt]  
#130 clinical trials [mh]  
#131 "clinical trial" [tw]  
#132 #32 OR #33 OR #34 OR #35 OR #36 OR #37 OR #38 OR #39 OR #40  
#134 singl\* [tw]  
#135 doubl\* [tw]  
#136 trebl\* [tw]  
#137 tripl\* [tw]  
#138 #134 OR #135 OR #136 OR #137  
#139 mask\* [tw]  
#140 blind\* [tw]  
#141 #139 OR #140  
#142 #138 AND #141  
#143 -placebos [mh]  
#144 placebo\* [tw]  
#145 random\* [tw]  
#146 research design [mh:noexp]  
#147 comparative study [pt]  
#148 evaluation studies [mh]  
#149 follow-up studies [mh]  
#150 prospective studies [mh]  
#151 control\* [tw]  
#152 prospective\* [tw]  
#153 volunteer\* [tw]  
#154 #143 OR #144 OR #145 OR #146 OR #147 OR #148 OR #149 OR #150 OR #151 OR #152  
OR #153  
#155 #132 OR #142 OR #154  
#156 #11 AND #122 AND #155

## **Supplementary eTables Legends**

**Supplementary Table S1.** Summary of included clinical trials and patient characteristics

**Supplementary Table S2.** Adjusting the confounding factors in all outcomes

**Supplementary Table S3.** Adjusting four selective design biases and model parameters for all outcomes

**Supplementary Table S4.** The results of compare models in all outcomes

**Supplementary Table S5.** The network results and the pairwise comparison results for healing  
(Separate Excel documents)

**Supplementary Table S6.** The network results and the pairwise comparison results for relief of symptoms (Separate Excel documents)

**Supplementary Table S7.** The network results and the pairwise comparison results for tolerance  
(Separate Excel documents)

**Supplementary Table S8.** The baseline results for the network analysis comprising sensitivity analyses

**Supplementary Table S9.** Estimates of effects and quality ratings for comparison of recommended doses of different drugs from the main outcome (healing) based on the GRADE system

**Supplementary Table S1** Summary of included clinical trials and patient characteristics

| Study                     | Year | County    | Drugs, dose, usage                                  | Total<br>(female)          | Age (Mean $\pm$ SD or<br>range)                      | Level of disease<br>from endoscopy or<br>symptoms | Mean courses<br>of disease  | Follow-up from<br>start of treatment<br>(weeks) | Might be<br>sponsor<br>drugs  | ITT/PP | Healing             | Relief of<br>symptoms   | Tolerance         |
|---------------------------|------|-----------|-----------------------------------------------------|----------------------------|------------------------------------------------------|---------------------------------------------------|-----------------------------|-------------------------------------------------|-------------------------------|--------|---------------------|-------------------------|-------------------|
| Kim <sup>1</sup>          | 2015 | Korea     | Omeprazole 20mg QD; Famotidine 20mg BID             | 167(46); 162(48)           | 50(20-74); 53(24-74)                                 | Reflux esophagitis<br>grade:A-D                   | $\geq 2$ weeks              | 8                                               | Omeprazole                    | ITT    | 126/147;<br>92/145  | 87/147; 58/144          | 10/147; 10/147    |
| Peura a <sup>2</sup>      | 2014 | USA       | Placebo; Esomeprazole 20mg QD                       | 163(95); 168(104)          | 45.9 $\pm$ 12.6; 43.6 $\pm$ 12.2                     | Heartburn: Mild;<br>Moderate; Severe              | $\geq 4$ weeks              | 2                                               | Esomeprazole                  | ITT    | NA                  | 54/163; 77/168          | 11/169; 8/171     |
| Peura b <sup>2</sup>      | 2014 | USA       | Placebo; Esomeprazole 20mg QD                       | 158(82); 162(86)           | 42.8 $\pm$ 13.2; 41.6 $\pm$ 14.0                     | Heartburn: Mild;<br>Moderate; Severe              | $\geq 4$ weeks              | 2                                               | Esomeprazole                  | ITT    | NA                  | 52/158; 78/162          | 19/171; 19/170    |
| Moraes-Filho <sup>3</sup> | 2014 | Brazil    | Esomeprazole 40mg QD; Pantoprazole 40mg QD          | 288(144); 290(162)         | 42.3 $\pm$ 12.6; 43.1 $\pm$ 11.5                     | LA: A-D                                           | NA                          | 8                                               | Esomeprazole;<br>Pantoprazole | ITT    | 253/279;<br>246/284 | 227/264; 252/275        | 85/288; 71/290    |
| Cho <sup>4</sup>          | 2012 | Korea     | Pantoprazole 20mg QD; Pantoprazole 40mg QD          | 67(22); 62(13)             | 51.2 $\pm$ 12.6; 49.5 $\pm$ 13.3                     | LA: A-C                                           | NA                          | 8                                               | None                          | PP     | 63/67; 60/62        | NA                      | 8/75; 12/74       |
| Kobeissy <sup>5</sup>     | 2012 | USA       | Ranitidine 150mg BID; Rabeprazole 10mg BID          | 39(23); 44(28)             | 45.1 $\pm$ 15.3; 45.4 $\pm$ 15.2                     | NA                                                | 3.9(4.2);<br>4.7(7.8) years | 4                                               | None                          | ITT    | NA                  | 17/39; 20/44            | 3/39; 4/44        |
| Tan <sup>6</sup>          | 2011 | Hong Kong | Placebo; Esomeprazole 40mg QD                       | 175(123)                   | 48.5; 48.3                                           | A Chinese GerdQ<br>reflux score $\geq$ 12         | NA                          | 8                                               | Esomeprazole                  | ITT    | NA                  | 29/78; 44/77            | 12/90; 8/85       |
| Laine a <sup>7</sup>      | 2011 | Mix       | Rabeprazole 50mg QD; Esomeprazole 40mg QD           | 524(202); 531(206)         | 48.0 $\pm$ 13.4; 49.0 $\pm$ 13.1                     | LA: C,D                                           | $\geq 3$ months             | 8                                               | Rabeprazole                   | ITT    | 419/524;<br>398/531 | 253/524; 256/531        | 45/524; 40/531    |
| Laine b <sup>7</sup>      | 2011 | Mix       | Rabeprazole 50mg QD; Esomeprazole 40mg QD           | 528(179); 537(195)         | 51.0 $\pm$ 12.8; 49.1 $\pm$ 13.4                     | LA: C,D                                           | $\geq 3$ months             | 8                                               | Rabeprazole                   | ITT    | 409/528;<br>421/537 | 281/528; 282/537        | 43/528; 42/537    |
| Kinoshita <sup>8</sup>    | 2011 | Japan     | Placebo; Rabeprazole 5mg QD; Rabeprazole<br>10mg QD | 91(51); 93(55);<br>101(51) | 49.7 $\pm$ 17.0; 46.3 $\pm$ 15.3;<br>46.8 $\pm$ 15.7 | Heartburn: Mild;<br>Moderate; Severe              | NA                          | 4                                               | Rabeprazole                   | ITT    | NA                  | 31/91; 44/93;<br>56/101 | 5/93; 5/93; 4/102 |
| Ohara <sup>9</sup>        | 2010 | Japan     | Placebo; Famotidine 20mg BID;                       | 158(32); 150(38)           | 52.9; 52.6                                           | LA: A,B                                           | NA                          | 8                                               | None                          | PP     | 14/145;<br>86/140   | NA                      | 24/169; 23/163    |
| Johnson <sup>10</sup>     | 2010 | USA       | Placebo; Esomeprazole 20mg QD                       | 125(85); 137(89)           | 46.8 $\pm$ 12.9; 47.0 $\pm$ 11.7                     | NA                                                | $\geq 3$ months             | 4                                               | Esomeprazole                  | ITT    | NA                  | 9/125; 45/137           | 8/133; 6/143      |



|                         |      |           |                                              |                     |                        |                  |                  |   |               |              |               |                     |                   |
|-------------------------|------|-----------|----------------------------------------------|---------------------|------------------------|------------------|------------------|---|---------------|--------------|---------------|---------------------|-------------------|
| Zheng <sup>11</sup>     | 2009 | China     | Omeprazole 20mg QD; Pantoprazole 40mg QD;    | 68(35); 69(35);     | 57.9±14.1; 57.8±13.2;  | LA: A-D          | NA               | 8 | None          | PP           | 57/65; 60/67; | NA                  | 3/68; 2/69; 2/69; |
|                         |      |           | Lansoprazole 30mg QD; Esomeprazole 40mg QD   | 69(34); 68(35)      | 58.1±13.0; 57.4±12.8   |                  |                  |   |               |              | 61/67; 62/65  |                     | 3/68              |
| Peura <sup>12</sup>     | 2009 | USA       | Placebo; Lansoprazole 15mg QD; Lansoprazole  | 277(181); 291(173); | 47.4±13.7; 48.2±14.5;  | Heartburn: Mild; | NA               | 2 | Lansoprazole  | ITT          | NA            | 82/277; 145/291;    | 12/277; 13/291;   |
|                         |      |           | 30mg QD                                      | 284(183)            | 48.8±14.1              |                  |                  |   |               |              |               |                     | Moderate; Severe  |
| Kushner a <sup>13</sup> | 2009 | USA       | Placebo; Lansoprazole 15mg QD                | 282(182); 282(178)  | 48.1(13.8); 46.3(13.8) | Heartburn: Mild; | 4.0(1.6);        | 2 | Lansoprazole  | ITT          | NA            | NA                  | 11/282; 13/282    |
| Kushner b <sup>13</sup> | 2009 | USA       | Placebo; Lansoprazole 15mg QD                | 282(190); 288(190)  | 47.6(13.2); 49.5(14.1) |                  |                  |   |               |              |               |                     | Moderate; Severe  |
| Eggleston <sup>14</sup> | 2009 | Australia | Rabeprazole 20mg QD; Esomeprazole 20mg QD;   | 464(264); 459(208); | 45.8±0.68; 46.2±0.69;  | NA               | ≥ 3 months       | 4 | Rabeprazole;  | ITT          | NA            | 405/464; 414/459;   | 69/464; 59/459;   |
|                         |      |           | Esomeprazole 40mg QD                         | 469(208)            | 48±0.68                |                  |                  |   |               |              |               |                     | Esomeprazole      |
| Uemura <sup>15</sup>    | 2008 | Japan     | Placebo; Omeprazole 10mg QD; Omeprazole      | 92(19); 96(49);     | 42.4±15.4; 44.4±16.2;  | Heartburn: Mild; | NA               | 4 | Omeprazole    | ITT          | NA            | 22/95; 44/96; 43/93 | 7/95; 3/96; 3/93  |
|                         |      | 20mg QD   | 93(40)                                       | 43.8±16.4           | Moderate; Severe       |                  |                  |   |               |              |               |                     |                   |
| Hongo <sup>16</sup>     | 2008 | Japan     | Placebo; Famotidine 20mg QD; Famotidine 40mg | 177(97); 177(97);   | 47.3; 47.4; 46.3       | Heartburn: Mild  | NA               | 8 | Famotidine    | ITT          | NA            | 106/177; 120/177;   | 11/177; 9/177;    |
|                         |      | QD        | 174(87)                                      |                     | 132/174                |                  |                  |   |               |              |               |                     | 9/174             |
| Pilotto <sup>17</sup>   | 2007 | Italy     | Omeprazole 20mg QD; Pantoprazole 40mg QD;    | 80(36); 80(41);     | 77.9±6.4; 76.8±6.1;    | SM: 1-4          | NA               | 8 | None          | ITT          | 60/80; 68/80; | 64/80; 62/80;       | 6/80; 3/80; 5/80; |
|                         |      |           | Lansoprazole 30mg QD; Rabeprazole 20mg QD    | 80(44); 80(43)      | 77.8±9.2; 77.0±9.5     |                  |                  |   |               |              |               |                     | 72/80; 71/80      |
| Männikes <sup>18</sup>  | 2007 | Germany   | Pantoprazole 20mg QD; Esomeprazole 20mg QD   | 263(159); 266(167)  | 51.2±14.2; 52.6±15.4   | LA: A-D          | NA               | 4 | Pantoprazole; | ITT          | NA            | 211/263; 211/266    | 41/263; 37/266    |
| Glatzel <sup>19</sup>   | 2007 | Germany   | Pantoprazole 40mg QD; Esomeprazole 40mg QD   | 284(125); 277(136)  | 52.6±14.5; 54.0±14.3   | LA: A-D          | NA               | 4 | Pantoprazole; | ITT          | NA            | NA                  | 40/284; 45/277    |
|                         |      |           |                                              |                     |                        |                  |                  |   |               | Esomeprazole |               |                     |                   |
| Bardhan <sup>20</sup>   | 2007 | Germany   | Pantoprazole 40mg QD; Esomeprazole 40mg QD   | 288(139); 293(139)  | 53±14; 54±14           | LA: A-D          | NA               | 8 | Pantoprazole; | ITT          | 248/288;      | 222/288; 220/293    | NA                |
| Bytzer <sup>21</sup>    | 2006 | Europe    | Omeprazole 20mg QD; Rabeprazole 20mg QD      | 359(162); 358(181)  | 51.7(19-81);           | LA: A-D          | 84.2(3.3-729.3); | 1 | Omeprazole;   | ITT          | NA            | NA                  | 178/359;          |
|                         |      |           |                                              |                     | 50.6(18-87)            |                  |                  |   |               |              |               |                     | 73.7(3.1-626.4)   |
| Lightdale <sup>22</sup> | 2006 | USA       | Esomeprazole 20mg QD; Omeprazole 20mg QD     | 588(216); 588(212)  | 44.7(13.2); 45.3(13.0) | LA: A-D          | NA               | 8 | Esomeprazole; | PP           | 508/588;      | NA                  | 9/588; 10/588     |

|                           |      |                                   |                                                                   |                                 |                                             |                                      |                             |   |  |                             |     |                     |                              |                         |
|---------------------------|------|-----------------------------------|-------------------------------------------------------------------|---------------------------------|---------------------------------------------|--------------------------------------|-----------------------------|---|--|-----------------------------|-----|---------------------|------------------------------|-------------------------|
|                           |      |                                   |                                                                   |                                 |                                             |                                      |                             |   |  | Omeprazole                  |     | 484/588             |                              |                         |
| Schmitt <sup>23</sup>     | 2006 | USA                               | Esomeprazole 40mg QD; Omeprazole 20mg QD                          | 576(230); 572(237)              | 47.1(13.3); 46.2(13.6)                      | LA: A-D                              | NA                          | 8 |  | Esomeprazole;<br>Omeprazole | PP  | 501/576;<br>491/572 | NA                           | 18/576; 10/572          |
| Pace <sup>24</sup>        | 2005 | Italy                             | Omeprazole 20mg QD; Rabeprazole 20mg QD                           | 272(88); 277(87)                | 47.1±14.9; 47.4±14.2                        | SM: 0-3                              | 56.6(67.2);<br>51.5(59.0)   | 8 |  | None                        | PP  | 231/237;<br>228/237 | NA                           | 22/277; 25/283          |
| Kahrilas <sup>25</sup>    | 2005 | USA                               | Placebo; Rabeprazole 20mg QD                                      | 126(86); 126(89)                | 44.0±0.99; 43.1±1.04                        | Modified HD: 0,1                     | 7.8(0.63)                   | 4 |  | None                        | ITT | NA                  | 24/126; 66/126               | 15/132; 14/129          |
| Johnson <sup>26</sup>     | 2005 | USA                               | Placebo; Esomeprazole 20mg QD; Esomeprazole 40mg QD               | 221(131); 220(132);<br>209(125) | 46.5±13.6; 46.8±14.0;<br>46.3±14.6          | Heartburn: Mild;<br>Moderate; Severe | ≥ 3 months                  | 4 |  | Esomeprazole                | ITT | NA                  | 18/221; 102/220;<br>98/209   | 17/229; 8/226;<br>8/220 |
| Fock <sup>27</sup>        | 2005 | Asia                              | Rabeprazole 10mg QD; Esomeprazole 20mg QD                         | 63(25); 64(37)                  | 39.3±11.2; 38.4±10.0                        | NA                                   | 3.2(4.2);<br>3.9(4.7) years | 4 |  | None                        | ITT | NA                  | 37/63; 27/64                 | 23/63; 30/64            |
| Fennerty <sup>28</sup>    | 2005 | USA                               | Esomeprazole 40mg QD; Lansoprazole 30mg QD                        | 498(171); 501(168)              | 47.3±13.2; 47.1±12.9                        | LA: C,D                              | NA                          | 8 |  | Esomeprazole                | ITT | 386/498;<br>367/501 | 344/478; 307/483             | 32/499; 30/502          |
| Van Zyl <sup>29</sup>     | 2004 | Germany<br>and South<br>Africa    | Ranitidine 300mg QD; Pantoprazole 20mg QD                         | 171(86); 167(81)                | 49.7±14.2; 48.1±15.0                        | NA                                   | ≥ 3 months                  | 4 |  | Pantoprazole                | ITT | NA                  | 114/167; 74/171              | 14/171; 18/167          |
| Gillessen <sup>30</sup>   | 2004 | Germany                           | Pantoprazole 40mg QD; Esomeprazole 40mg QD                        | 113(49); 114(57)                | 53±15; 54±14                                | NA                                   | NA                          | 8 |  | None                        | ITT | 69/113;<br>70/114   | 57/113; 54/114               | 19/113; 11/114          |
| Armstrong a <sup>31</sup> | 2004 | Canada,<br>England<br>and Ireland | Omeprazole 20mg QD; Esomeprazole 20mg QD;<br>Esomeprazole 40mg QD | 434(247); 423(240);<br>425(242) | 48.3(19-78);<br>48.0(18-80);<br>48.4(19-79) | NA                                   | ≥ 6 months                  | 4 |  | Omeprazole;<br>Esomeprazole | ITT | NA                  | 252/434; 256/423;<br>241/425 | NA                      |
| Armstrong b <sup>31</sup> | 2004 | France,<br>Germany<br>and         | Omeprazole 20mg QD; Esomeprazole 40mg QD                          | 346(190); 347(193)              | 50.0(19-83);<br>50.6(21-77)                 | NA                                   | ≥ 6 months                  | 4 |  | Omeprazole;<br>Esomeprazole | ITT | NA                  | 235/346; 244/347             | NA                      |

|                           |      |                                              |                                                                       |                                       |                                    |                                      |             |   |                               |     |                        |                                |                          |
|---------------------------|------|----------------------------------------------|-----------------------------------------------------------------------|---------------------------------------|------------------------------------|--------------------------------------|-------------|---|-------------------------------|-----|------------------------|--------------------------------|--------------------------|
| Armstrong c <sup>31</sup> | 2004 | Switzerland                                  | Omeprazole 20mg QD; Esomeprazole 20mg QD                              | 334(166); 336(161)                    | 48.5(19-79);                       | NA                                   | ≥ 6 months  | 4 | Omeprazole;                   | ITT | NA                     | 199/334; 208/336               | NA                       |
|                           |      | Denmark,<br>Finland,<br>Norway<br>and Sweden |                                                                       |                                       | 48.5(20-79)                        |                                      |             |   | Esomeprazole                  |     |                        |                                |                          |
| Scholten <sup>32</sup>    | 2003 | Germany                                      | Pantoprazole 40mg QD; Esomeprazole 40mg QD                            | 112(43); 105(48)                      | 54.7±15.1; 52.6±13.8               | LA: B,C                              | NA          | 5 | Pantoprazole;<br>Esomeprazole | ITT | NA                     | 80/112; 74/105 *               | 13/112; 10/105           |
| Katz a <sup>33</sup>      | 2003 | USA                                          | Placebo; Esomeprazole 20mg QD; Esomeprazole 40mg QD                   | 124(62.9);<br>121(59.5);<br>123(61.0) | 46(19-82); 47(21-75);<br>47(20-78) | Heartburn: Mild;<br>Moderate; Severe | ≥ 6 months  | 4 | None                          | ITT | NA                     | 17/123; 41/121;<br>41/124 *    | 6/123; 9/121;<br>9/124   |
| Katz b <sup>33</sup>      | 2003 | USA                                          | Placebo; Esomeprazole 20mg QD; Esomeprazole 40mg QD                   | 118(57.6);<br>113(69.9);<br>118(64.4) | 47(21-77); 46(19-75);<br>45(19-77) | Heartburn: Mild;<br>Moderate; Severe | ≥ 6 months  | 4 | None                          | ITT | NA                     | 14/118; 47/113;<br>43/118 *    | 12/118; 11/113;<br>4/118 |
| Kürner <sup>34</sup>      | 2003 | Europe                                       | Omeprazole 40mg QD; Pantoprazole 40mg QD                              | 332(146); 337(121)                    | 53.8±14.6; 53.7±14.3               | SM: 2,3                              | NA          | 8 | Omeprazole,<br>Pantoprazole   | ITT | 220/332;<br>220/337    | 250/270; 257/282               | 4/332; 3/337             |
| Kao <sup>35</sup>         | 2003 | Taiwan                                       | Omeprazole 40mg QD; Esomeprazole 20mg QD                              | 50(15); 50(16)                        | 49.2; 49.8                         | LA: A,B                              | NA          | 4 | None                          | ITT | NA                     | 34/50; 23/50                   | 4/50; 5/50               |
| Adachi <sup>36</sup>      | 2003 | Japan                                        | Omeprazole 20mg QD; Rabeprazole 20mg QD                               | 30(15); 30(15)                        | 67.3±11.7; 65.3±13.0               | LA: A-D                              | NA          | 8 | None                          | ITT | NA                     | NA                             | 2/30; 2/30               |
| Mulder <sup>37</sup>      | 2002 | Netherland                                   | Omeprazole 20mg QD; Pantoprazole 40mg QD;<br>Lansoprazole 30mg QD     | 151(63); 154(60);<br>156(66)          | 51.6±15.0; 51.2±14.4;<br>50.8±14.5 | Modified SM: 1-4                     | NA          | 8 | None                          | ITT | NA                     | 131/151; 125/154;<br>139/156 * | 7/151; 5/154;<br>11/156  |
| Miner <sup>38</sup>       | 2002 | USA                                          | Placebo; Rabeprazole 10mg QD; Rabeprazole 20mg QD                     | 70(46); 65(37);<br>68(43)             | 46.1±1.2; 44.4±1.5;<br>45.5±1.3    | HD: 0,1                              | NA          | 4 | Rabeprazole                   | ITT | NA                     | 22/68; 36/64; 38/67            | NA                       |
| Meneghelli <sup>39</sup>  | 2002 | Brazil                                       | Ranitidine 150mg BID; Pantoprazole 40mg QD                            | 128(40); 128(48)                      | 47.0(21-74);<br>46.5(19-82)        | SM: 2,3                              | NA          | 8 | Ranitidine,<br>Pantoprazole   | ITT | 52/128;<br>96/128      | 60/113; 99/109 *               | 18/128; 21/128           |
| Kovacs <sup>40</sup>      | 2002 | USA                                          | Nizatidine 150mg BID; Pantoprazole 20mg BID;<br>Pantoprazole 40mg BID | 221(66)                               | 50.1±13.4; 47.8±12.9;<br>49.4±13.8 | HD 2-4                               | NA          | 8 | Nizatidine,<br>Pantoprazole   | ITT | 29/70; 57/72;<br>58/70 | NA                             | NA                       |
| Holtmann <sup>41</sup>    | 2002 | Europe                                       | Omeprazole 40mg QD; Rabeprazole 20mg QD                               | 116(36); 118(44)                      | 51.0(18-79);                       | SM: 2,3                              | 2.51(0-19); | 8 | Omeprazole,                   | ITT | NA                     | NA                             | 9/126; 12/125            |

| Author                  | Year | Country         | Intervention                                                                 | Control                              | Primary Outcome (Mean ± SD)                   | Secondary Outcome (Mean ± SD) | Study Design | Duration (months) | Intervention                | Control | Primary Outcome (n/N)           | Secondary Outcome (n/N)      | Other Outcomes            |
|-------------------------|------|-----------------|------------------------------------------------------------------------------|--------------------------------------|-----------------------------------------------|-------------------------------|--------------|-------------------|-----------------------------|---------|---------------------------------|------------------------------|---------------------------|
|                         |      |                 |                                                                              |                                      | 52.9(20-80)                                   | 2.55(0-21)                    |              |                   | Rabeprazole                 |         |                                 |                              |                           |
|                         |      |                 |                                                                              |                                      |                                               |                               |              | years             |                             |         |                                 |                              |                           |
| Castell <sup>42</sup>   | 2002 | USA             | Lansoprazole 30mg QD; Esomeprazole 40mg QD                                   | 2627(1116);<br>2624(1120)            | 47.4±13.1; 47.0±13.0                          | LA: A-D                       | NA           | 4                 | None                        | ITT     | 2324/2617;<br>2430/2624         | 1575/2627;<br>1650/2624 *    | NA                        |
| Richter <sup>43</sup>   | 2001 | USA             | Omeprazole 20mg QD; Lansoprazole 30 mg QD                                    | 1756(772); 1754<br>(747)             | 46.9±13.6; 47.8±13.8                          | SM: 1-4                       | NA           | 8                 | Omeprazole,<br>Lansoprazole | ITT     | NA                              | 1457/1756;<br>1479/1754      | 78/1756;<br>75/1754       |
| Richter <sup>44</sup>   | 2001 | USA             | Omeprazole 20mg QD; Esomeprazole 40mg QD                                     | 1209(449);<br>1216(496)              | NA                                            | LA: A-D                       | NA           | 8                 | Omeprazole,<br>Esomeprazole | ITT     | 1018/1209;<br>1139/1216         | 929/1209;<br>1036/1216       | 54/1209;<br>55/1216       |
| Paul <sup>45</sup>      | 2001 | USA             | Placebo; Nizatidine 75mg BID                                                 | 496(262); 498(277)                   | 43.5(16-81);<br>42.3(16-81)                   | NA                            | ≥ 3 months   | 2                 | None                        | ITT     | NA                              | 119/496; 184/498 *           | NA                        |
| Kaspari <sup>46</sup>   | 2001 | Germany         | Ranitidine 150mg BID; Pantoprazole 20mg QD                                   | 175(88); 181(97)                     | 48.8±13.2; 48.5±13.8                          | SM: 0,1                       | ≥ 3 months   | 4                 | Ranitidine,<br>Pantoprazole | ITT     | NA                              | 91/132; 124/141              | 42/175; 37/181            |
| Bardhan <sup>47</sup>   | 2001 | Europe          | Omeprazole 20mg QD; Pantoprazole 20mg QD                                     | 161(58); 166(79)                     | 45.2±14.4; 44.6±13.3                          | SM: 1                         | NA           | 8                 | None                        | ITT     | 142/161;<br>134/166             | 140/161; 138/166             | 30/161; 33/166            |
| Armstrong <sup>48</sup> | 2001 | Canada          | Nizatidine 150mg BID; Pantoprazole 40 mg QD                                  | 102(51); 106(49)                     | 47.6±14.1; 47.1±14.0                          | SM: 0-3                       | ≥ 6 months   | 4                 | Nizatidine                  | ITT     | 73/109;<br>95/111               | 37/109; 67/111 *             | 15/109; 10/111            |
| Van Zyl <sup>49</sup>   | 2000 | South<br>Africa | Ranitidine 300mg QD; Pantoprazole 20mg QD                                    | 100(44); 101(40)                     | 18-82                                         | NA                            | NA           | 8                 | Ranitidine,<br>Pantoprazole | ITT     | 69/100;<br>84/101               | 45/89; 74/88                 | 16/100; 13/101            |
| Richter <sup>50</sup>   | 2000 | USA             | Placebo; Omeprazole 10mg QD; Omeprazole<br>20mg QD                           | 123(56); 118(53);<br>118(57)         | 49.7; 50.0; 49.5                              | NA                            | ≥ 12 months  | 4                 | Omeprazole                  | ITT     | NA                              | 28/123; 58/118;<br>87/118 *  | NA                        |
| Richter <sup>51</sup>   | 2000 | USA             | Placebo; Pantoprazole 10mg QD; Pantoprazole<br>20mg QD; Pantoprazole 40mg QD | 82(29); 174(63);<br>174(59); 173(52) | 48.3±14.0; 49.6±13.9;<br>48.7±12.4; 49.3±13.6 | HD: 1-4                       | NA           | 8                 | Omeprazole,<br>Pantoprazole | ITT     | 102/174;<br>135/174;<br>152/173 | NA                           | NA                        |
| Kahrilas <sup>52</sup>  | 2000 | USA             | Omeprazole 20mg QD; Esomeprazole 20mg QD;<br>Esomeprazole 40mg QD            | 650(251); 656(265);<br>654(270)      | 46.5±13.5; 45.3±13.3;<br>44.8±13.0            | LA: A-D                       | NA           | 8                 | Omeprazole,<br>Esomeprazole | ITT     | 565/650;<br>590/656;            | 357/624; 382/626;<br>402/621 | 51/650; 60/654;<br>48/656 |

| Author                 | Year | Country            | Intervention                                                         | Control                            | Primary Outcome                            | Secondary Outcome | Duration                        | Sample Size | Comparator               | Design | Number of Events       | Relative Risk (95% CI)           | Number of Events           |
|------------------------|------|--------------------|----------------------------------------------------------------------|------------------------------------|--------------------------------------------|-------------------|---------------------------------|-------------|--------------------------|--------|------------------------|----------------------------------|----------------------------|
| Fass <sup>53</sup>     | 2000 | USA                | Omeprazole 40 mg QD; Lansoprazole 30mg BID                           | 46(2); 44(4)                       | 57.8±14.7; 57.8±12.1                       | NA                | ≥ 3 months                      | 6           | Omeprazole, Lansoprazole | ITT    | NA                     | 8/46; 10/44 *                    | 4/50; 2/46                 |
| Farley <sup>54</sup>   | 2000 | UK                 | Ranitidine 150mg QID; Rabeprazole 20mg QD                            | 169(56); 169(51)                   | 50.4±14.2; 51.4±14.9                       | Modified HD: 2-4  | NA                              | 8           | Ranitidine, Rabeprazole  | ITT    | 112/169; 146/167       | 108/158; 127/161                 | 12/169; 15/167             |
| Delchier <sup>55</sup> | 2000 | Europe             | Omeprazole 20mg QD; Rabeprazole 10mg QD; Rabeprazole 20mg BID        | 103(63); 103(72); 104(57)          | 53±15.1; 52±14.3; 55±15.7                  | HD: 2-4           | NA                              | 8           | Omeprazole, Rabeprazole  | ITT    | 97/103; 94/103; 95/104 | NA                               | 17/104; 21/103; 25/104     |
| Richter <sup>56</sup>  | 1999 | USA                | Placebo; Lansoprazole 15mg QD; Lansoprazole 30mg QD                  | 43(25); 80(41); 86(47)             | 46.4±12.5; 44.9±14.9; 43.4±13.5            | NA                | NA                              | 4-8         | Lansoprazole             | ITT    | NA                     | NA                               | 7/43; 5/80; 8/86           |
| Pappa <sup>57</sup>    | 1999 | USA                | Placebo; Ranitidine 25mg QID; Ranitidine 75mg QID                    | 494(177); 504(178); 491(156)       | 47.3(18-83); 46.7(18-84); 47.4(18-87)      | NA                | ≥ 3 months                      | 2           | Ranitidine               | ITT    | NA                     | 197/470; 245/480; 275/482        | 24/494; 24/504; 9/491      |
| Pappa <sup>58</sup>    | 1999 | USA                | Placebo; Ranitidine 25mg QD; Ranitidine 75mg QD; Ranitidine 125mg QD | 143(48); 144(49); 143(47); 147(58) | 41.0±1.06; 42.0±1.09; 39.5±1.09; 40.8±1.02 | NA                | ≥ 3 months                      | 4           | Ranitidine               | ITT    | NA                     | 72/143; 97/144; 102/143; 104/147 | 3/143; 3/144; 4/143; 5/147 |
| Maton <sup>59</sup>    | 1999 | USA                | Ranitidine 150mg BID; Omeprazole 20mg QD                             | 161(90); 156(91)                   | 45.8; 44.7                                 | NA                | ≥ 6 months                      | 8           | Ranitidine, Omeprazole   | ITT    | NA                     | 71/144; 104/148                  | 15/161; 8/156              |
| Jones <sup>60</sup>    | 1999 | UK                 | Omeprazole 10mg QD; Lansoprazole 15mg QD                             | 279(143); 283(143)                 | 46; 47                                     | NA                | NA                              | 4           | Omeprazole, Lansoprazole | ITT    | NA                     | 142/279; 167/283 *               | 50/279; 48/283             |
| Jansen <sup>61</sup>   | 1999 | Netherland         | Ranitidine 300mg BID; Lansoprazole 30mg QD                           | 65(24); 68(26)                     | 53.3±13.7; 53.7±14.8                       | NA                | NA                              | 8           | None                     | ITT    | 43/65; 62/68           | 43/65; 60/68                     | 2/65; 7/68                 |
| Festen <sup>62</sup>   | 1999 | Netherland         | Ranitidine 300mg BID; Omeprazole 20mg QD                             | 224(109); 222(104)                 | 49.8±13.9; 51.1±14.5                       | SM: 1,2           | NA                              | 8           | Ranitidine, Omeprazole   | ITT    | NA                     | 112/224; 165/222                 | 29/224; 28/222             |
| Galmiche <sup>63</sup> | 1998 | France and Germany | Placebo; Cimetidine 200mg QD; Ranitidine 75mg QD                     | 270(161); 515(306); 504(285)       | 49.9±0.9; 50.6±0.7; 48.0±0.6               | SM: 0,1           | 5.5±0.4; 5.6±0.3; 5.1±0.3 years | 2           | Cimetidine, Ranitidine   | ITT    | NA                     | 208/270; 417/515; 423/504        | 52/270; 83/515; 64/504     |
| Earnest <sup>64</sup>  | 1998 | USA                | Placebo; Lansoprazole 15mg QD; Lansoprazole                          | NA                                 | NA                                         | NA                | NA                              | 8           | Lansoprazole             | ITT    | 31/66; 60/72;          | NA                               | 7/66; 6/72; 6/71;          |

|                        |      |             |                                                                            |                                         |                                                             |                                      |            |   |                           |     |                                            |                              |                                   |
|------------------------|------|-------------|----------------------------------------------------------------------------|-----------------------------------------|-------------------------------------------------------------|--------------------------------------|------------|---|---------------------------|-----|--------------------------------------------|------------------------------|-----------------------------------|
|                        |      |             | 30mg QD; Lansoprazole 60mg QD                                              |                                         |                                                             |                                      |            |   |                           |     | 62/71; 70/79                               | 8/79                         |                                   |
| Detmer <sup>65</sup>   | 1998 | Germany     | Ranitidine 300mg QD; Pantoprazole 20mg QD                                  | 104(39); 105(41)                        | 54(21-82); 47(19-80)                                        | SM: 1                                | NA         | 8 | Pantoprazole              | ITT | 63/104;<br>78/105                          | 55/84; 68/85                 | 18/104; 18/105                    |
| Venables <sup>66</sup> | 1997 | UK          | Ranitidine 150mg BID; Omeprazole 10mg QD;<br>Omeprazole 20mg QD            | 326(50); 338(51);<br>320(48)            | 50±14; 51±15; 51±14                                         | Modified SM: 0-1                     | NA         | 4 | Ranitidine,<br>Omeprazole | ITT | NA                                         | 131/326; 167/338;<br>200/330 | NA                                |
| Galmiche <sup>67</sup> | 1997 | Europe      | Omeprazole 10mg QD; Omeprazole 20mg QD                                     | 144(89); 141(78)                        | 51±15; 50±16                                                | Heartburn: Mild;<br>Moderate; Severe | ≥ 3 months | 8 | Omeprazole                | ITT | NA                                         | 102/144; 112/141             | NA                                |
| Bate <sup>68</sup>     | 1997 | UK          | Cimetidine 400mg QD; Omeprazole 20mg QD                                    | 109(37); 112(48)                        | 46±14; 49±13                                                | SM: 0-3                              | NA         | 4 | Cimetidine,<br>Omeprazole | ITT | NA                                         | 34/109; 74/112               | 22/109; 14/112                    |
| Silver <sup>69</sup>   | 1996 | USA         | Placebo; Ranitidine 300 mg BID; Ranitidine<br>150mg QID                    | 251(81); 260(83);<br>261(91)            | 47.9; 48.6; 48.8                                            | HD: 2-4                              | NA         | 8 | Ranitidine                | ITT | 79/217;<br>118/230;<br>145/235             | NA                           | 51/251; 38/260;<br>40/261         |
| Rensburg <sup>70</sup> | 1996 | Germany     | Pantoprazole 40mg QD; Pantoprazole 80mg QD                                 | 97(40); 95(38)                          | 46(18-88); 46(21-89)                                        | SM: 2,3                              | NA         | 8 | Pantoprazole              | ITT | 82/97; 82/95                               | 83/86; 85/87                 | NA                                |
| Mee <sup>71</sup>      | 1996 | UK, Ireland | Lansoprazole 30mg QD; Omeprazole 20mg QD                                   | NA                                      | 18-80                                                       | SM: 1-4                              | NA         | 8 | None                      | ITT | 226/300;<br>216/304                        | NA                           | 75/300; 75/304                    |
| Mccarty-Dawson<br>72   | 1996 | USA         | Cimetidine 800mg BID; Ranitidine 150mg BID;<br>Ranitidine 150mg QID        | 231(89); 236(99);<br>229(84)            | 46.8; 48.4; 46.5                                            | HD: 2-4                              | NA         | 8 | Cimetidine,<br>Ranitidine | ITT | 120/231;<br>132/236;<br>153/229            | NA                           | 43/231; 32/236;<br>20/229         |
| Castell <sup>73</sup>  | 1996 | UK          | Placebo; Omeprazole 20mg QD; Lansoprazole<br>15mg QD; Lansoprazole 30mg QD | 213(71); 431(171);<br>218(73); 421(133) | 47.6(18-80);<br>47.5(19-78);<br>45.8(20-82);<br>48.6(18-84) | HD: 2-4                              | NA         | 8 | None                      | ITT | 68/213;<br>375/431;<br>164/218;<br>367/421 | NA                           | 15/213; 13/431;<br>10/218; 20/422 |
| Bate <sup>74</sup>     | 1996 | Europe      | Placebo; Omeprazole 20mg QD                                                | 111(69); 98(56)                         | 51±14; 47±14                                                | SM: 0,1                              | NA         | 4 | Omeprazole                | ITT | NA                                         | 21/111; 56/98 *              | 22/111; 18/98                     |
| Robinson <sup>75</sup> | 1995 | USA         | Ranitidine 150mg BID; Lansoprazole 30mg QD                                 | 127(48); 115(43)                        | NA                                                          | HD: 2-4                              | NA         | 8 | None                      | ITT | 83/127;<br>102/115                         | NA                           | 4/127; 1/115                      |
| Mossner <sup>76</sup>  | 1995 | Germany     | Omeprazole 20mg QD; Pantoprazole 40mg QD                                   | 95(29); 191(58)                         | 55(21-81); 53(19-89)                                        | SM: 2,3                              | NA         | 8 | None                      | PP  | 81/86;                                     | 81/86; 149/165               | 1/95; 2/191                       |

|                        |      |                   |                                                                     |                              |                                           |                              |             |   |            |     |                              |                              |                           |
|------------------------|------|-------------------|---------------------------------------------------------------------|------------------------------|-------------------------------------------|------------------------------|-------------|---|------------|-----|------------------------------|------------------------------|---------------------------|
|                        |      |                   |                                                                     |                              |                                           |                              |             |   |            |     | 153/170                      |                              |                           |
| Koop <sup>77</sup>     | 1995 | USA               | Ranitidine 150mg BID; Pantoprazole 40mg QD                          | 83(17); 166(97)              | 53; 53                                    | SM: 2,3                      | NA          | 8 | None       | ITT | 46/83;<br>122/166            | 35/83; 104/166               | NA                        |
| Bardhan <sup>78</sup>  | 1995 | UK                | Ranitidine 150mg BID; Lansoprazole 30mg QD;<br>Lansoprazole 60mg QD | 77(22); 77 (27);<br>75(25)   | 49.3(19-74);<br>48(19-78);<br>47.9(18-74) | Reflux grades: 1-3           | NA          | 8 | None       | ITT | 37/77; 70/77;<br>59/75       | 30/77; 61/77; 54/75<br>*     | 20/77; 20/77;<br>16/75    |
| Simon <sup>79</sup>    | 1993 | USA               | Ranitidine 150mg BID; Famotidine 20mg BID;<br>Famotidine 40mg BID   | 172(65); 93(31);<br>175(61)  | 48.9; 52.2; 50.5                          | Modified SM: 2-4             | NA          | 6 | None       | ITT | 76/172; 48/93;<br>81/175     | 117/172; 56/93;<br>119/175 * | NA                        |
| Euler <sup>80</sup>    | 1993 | USA               | Placebo; Ranitidine 150mg QID; Ranitidine<br>300mg QID              | 116(34); 106(28);<br>106(23) | 48.6±1.4; 46.3±1.5;<br>49.7±1.5           | HD: 2-4                      | NA          | 8 | Ranitidine | ITT | 33/116;<br>73/106;<br>66/106 | NA                           | 37/116; 8/106;<br>12/106  |
| Roufail <sup>81</sup>  | 1992 | USA               | Placebo; Ranitidine 150mg QID; Ranitidine<br>300mg QID              | 113(28); 109(34);<br>120(38) | 48.6±1.3; 49.3±1.4;<br>48.4±1.3           | HD: 2-4                      | NA          | 8 | None       | ITT | 30/113;<br>68/109;<br>73/120 | NA                           | 33/113; 15/109;<br>18/120 |
| Cloud <sup>82</sup>    | 1992 | USA and<br>Canada | Placebo; Nizatidine 150mg BID; Nizatidine<br>300mg BID              | 178(67); 168(81);<br>169(77) | 44.78; 44.78; 45.83                       | Endoscopically<br>Grade: 1-4 | NA          | 6 | None       | ITT | 46/178;<br>69/168;<br>65/169 | NA                           | 45/178; 19/168;<br>26/169 |
| Sabesin <sup>83</sup>  | 1991 | USA               | Placebo; Famotidine 20mg BID; Famotidine<br>40mg QD                 | 66(27); 137(63);<br>135(56)  | 46.9±15.9; 47.3±13.7;<br>47.9±14.6        | HD: 0-4                      | NA          | 6 | None       | ITT | 4/66; 47/137;<br>39/135      | 26/66; 88/137;<br>99/135     | 22/66; 33/137;<br>37/135  |
| Robinson <sup>84</sup> | 1991 | USA               | Placebo; Famotidine 20mg BID; Famotidine<br>40mg QD                 | 76(31); 158(85);<br>155(81)  | 44.5±13.0; 45.2±14.2;<br>44.2±14.7        | HD: 0,1                      | NA          | 6 | Famotidine | ITT | NA                           | 29/76; 95/158;<br>71/155 *   | NA                        |
| Riemann <sup>85</sup>  | 1991 | Germany           | Placebo; Cimetidine 200mg QID                                       | 60(35); 60(26)               | 47.1(18-73);<br>48.9(18-69)               | Heartburn: Mild              | ≥ 30 months | 2 | None       | ITT | NA                           | 12/65; 22/60                 | 0/65; 0/60                |
| Quik <sup>86</sup>     | 1990 | Europe            | Placebo; Nizatidine 300mg QD; Nizatidine<br>300mg BID               | 107(40); 109(40);<br>109(37) | 52±17; 53±16; 53±16                       | NA                           | ≥ 3 months  | 6 | None       | ITT | 28/107;<br>33/109;<br>44/109 | NA                           | 10/107; 11/109;<br>7/109  |

|                          |      |         |                                          |                  |                             |                                                 |    |   |                           |     |              |                |                |
|--------------------------|------|---------|------------------------------------------|------------------|-----------------------------|-------------------------------------------------|----|---|---------------------------|-----|--------------|----------------|----------------|
| Palmer <sup>87</sup>     | 1990 | USA     | Placebo; Cimetidine 800mg BID            | 86(28); 93(26)   | 51±15; 50±16                | NA                                              | NA | 6 | None                      | ITT | 17/86; 47/93 | NA             | 27/86; 16/93   |
| Lundell <sup>88</sup>    | 1990 | Sweden  | Ranitidine 300mg BID; Omeprazole 40mg QD | 47(11); 51(15)   | 59.8±16.0; 58.1±16.2        | SM: 2-4                                         | NA | 8 | None                      | ITT | 18/47; 44/51 | 15/47; 44/51 * | NA             |
| Dehn <sup>89</sup>       | 1990 | UK      | Cimetidine 400mg QID; Omeprazole 40mg QD | 36(8); 31(10)    | 39.6(24-78);<br>54(21-74)   | Endoscopically<br>Grade: 2-4                    | NA | 8 | None                      | PP  | 7/31; 20/31  | 16/30; 23/31   | 5/36; 3/31     |
| Vantrappen <sup>90</sup> | 1988 | Europe  | Ranitidine 150mg BID; Omeprazole 40mg QD | 30(21); 31(23)   | 52.3(24-79);<br>55.4(26-79) | Endoscopically<br>Grade: 2,3                    | NA | 8 | None                      | ITT | 15/30; 25/31 | 11/30; 27/31   | 5/30; 6/31     |
| Havelund <sup>91</sup>   | 1988 | Denmark | Ranitidine 150mg BID; Omeprazole 40mg QD | 82(26); 80(32)   | 54.9(22-79);<br>53.7(24-79) | Endoscopically<br>Grade: 1-3                    | NA | 8 | Ranitidine,<br>Omeprazole | ITT | 44/82; 69/80 | NA             | 9/82; 5/80     |
| Sontag <sup>92</sup>     | 1987 | USA     | Placebo; Ranitidine 150mg BID            | 118(42); 119(39) | 48.2±1.40; 49.5±1.33        | Endoscopy grade:<br>Normal, Moderate,<br>Severe | NA | 6 | Ranitidine                | PP  | 29/71; 41/73 | NA             | 32/150; 15/134 |

QD: Quaque die; BID: Bis in die; TID: Ter in die; QID: Quaque in die; A Chinese GerdQ reflux score<sup>93</sup>: A 20-item GERD questionnaire in the Chinese language; LA<sup>94</sup>: The Los Angeles grade; SM<sup>95</sup>: The Savary-Miller criteria; HD<sup>96</sup>: The Hetzel-Dent scale; ITT: Intention-to-treat data; PP: Per-protocol data; NA: Not available; \*: Complete relief of symptoms.



## References

1. Kim, E. H. *et al.* Efficacy of Lafutidine Versus Famotidine in Patients with Reflux Esophagitis: A Multi-Center, Randomized, Double-Blind, Non-inferiority Phase III Trial. *Dig Dis Sci.* **60**, 1724-1732, doi:10.1007/s10620-014-3489-4 [doi] (2015).
2. Peura, D. A. *et al.* Esomeprazole Treatment of Frequent Heartburn: Two Randomized, Double-Blind, Placebo-Controlled Trials. *Postgraduate Medicine.* **126**, 33-41, doi:10.3810/pgm.2014.07.2781 (2015).
3. Moraes-Filho, J. P. *et al.* Randomised clinical trial: daily pantoprazole magnesium 40 mg vs. esomeprazole 40 mg for gastro-oesophageal reflux disease, assessed by endoscopy and symptoms. *Aliment Pharmacol Ther.* **39**, 47-56, doi:10.1111/apt.12540 (2014).
4. Cho, Y. K. *et al.* Efficacy of pantoprazole 20 mg compared with pantoprazole 40 mg in the treatment of reflux esophagitis: a randomized, double-blind comparative trial. *Dig Dis Sci.* **57**, 3189-3194, doi:10.1007/s10620-012-2297-y (2012).
5. Kobeissy, A. A. *et al.* A randomized open-label trial of on-demand rabeprazole vs ranitidine for patients with non-erosive reflux disease. *World J Gastroenterol.* **18**, 2390-2395, doi:10.3748/wjg.v18.i19.2390 (2012).
6. Tan, V. P. *et al.* Treatment of non-erosive reflux disease with a proton pump inhibitor in Chinese patients: a randomized controlled trial. *J Gastroenterol.* **46**, 906-912, doi:10.1007/s00535-011-0402-1 (2011).
7. Laine, L. *et al.* Randomised clinical trial: a novel rabeprazole extended release 50 mg formulation vs. esomeprazole 40 mg in healing of moderate-to-severe erosive oesophagitis - the results of two double-blind studies. *Aliment Pharmacol Ther.* **33**, 203-212, doi:10.1111/j.1365-2036.2010.04516.x (2011).
8. Kinoshita, Y. *et al.* Randomised clinical trial: a multicentre, double-blind, placebo-controlled study on the efficacy and safety of rabeprazole 5 mg or 10 mg once daily in patients with non-erosive reflux disease. *Aliment Pharmacol Ther.* **33**, 213-224, doi:10.1111/j.1365-2036.2010.04508.x (2011).
9. Ohara, S. *et al.* A double-blind, controlled study comparing lafutidine with placebo and famotidine in Japanese patients with mild reflux esophagitis. *J Gastroenterol.* **45**, 1219-1227, doi:10.1007/s00535-010-0283-8 (2010).
10. Johnson, D. *et al.* Clinical trial: esomeprazole for moderate-to-severe nighttime heartburn and gastro-oesophageal reflux disease-related sleep disturbances. *Aliment Pharmacol Ther.* **32**, 182-190, doi:10.1111/j.1365-2036.2010.04339.x (2010).
11. Zheng, R.-N. Comparative study of omeprazole, lansoprazole, pantoprazole and esomeprazole for symptom relief in patients with reflux esophagitis. *World Journal of Gastroenterology.* **15**, 990, doi:10.3748/wjg.15.990 (2009).
12. Peura, D. A. *et al.* Clinical trial: lansoprazole 15 or 30 mg once daily vs. placebo for treatment of frequent nighttime heartburn in self-treating subjects. *Aliment Pharmacol Ther.* **30**, 459-468, doi:10.1111/j.1365-2036.2009.04064.x (2009).
13. Kushner, P. R. *et al.* Lansoprazole 15 mg once daily for 14 days is effective for treatment of frequent heartburn: results of 2 randomized, placebo-controlled,

double-blind studies. *Postgrad Med.* **121**, 67-75, doi:10.3810/pgm.2009.07.2019 (2009).

14. Eggleston, A. *et al.* Clinical trial: the treatment of gastro-oesophageal reflux disease in primary care--prospective randomized comparison of rabeprazole 20 mg with esomeprazole 20 and 40 mg. *Aliment Pharmacol Ther.* **29**, 967-978, doi:10.1111/j.1365-2036.2009.03948.x (2009).
15. Uemura, N. *et al.* Efficacy and safety of omeprazole in Japanese patients with nonerosive reflux disease. *J Gastroenterol.* **43**, 670-678, doi:10.1007/s00535-008-2214-5 (2008).
16. Hongo, M. *et al.* A randomized, double-blind, placebo-controlled clinical study of the histamine H2-receptor antagonist famotidine in Japanese patients with nonerosive reflux disease. *J Gastroenterol.* **43**, 448-456, doi:10.1007/s00535-008-2186-5 (2008).
17. Pilotto, A. *et al.* Comparison of four proton pump inhibitors for the short-term treatment of esophagitis in elderly patients. *World J Gastroenterol.* **13**, 4467-4472 (2007).
18. Monnikes, H. *et al.* Novel measurement of rapid treatment success with ReQuest: first and sustained symptom relief as outcome parameters in patients with endoscopy-negative GERD receiving 20 mg pantoprazole or 20 mg esomeprazole. *Digestion.* **75 Suppl 1**, 62-68, doi:10.1159/000101084 (2007).
19. Glatzel, D. *et al.* Pantoprazole 40 mg is as effective as esomeprazole 40 mg to relieve symptoms of gastroesophageal reflux disease after 4 weeks of treatment and superior regarding the prevention of symptomatic relapse. *Digestion.* **75 Suppl 1**, 69-78, doi:10.1159/000101085 (2007).
20. Bardhan, K. D. *et al.* A clinical trial comparing pantoprazole and esomeprazole to explore the concept of achieving 'complete remission' in gastro-oesophageal reflux disease. *Aliment Pharmacol Ther.* **25**, 1461-1469, doi:10.1111/j.1365-2036.2007.03337.x (2007).
21. Bytzer, P. *et al.* Effect of rabeprazole and omeprazole on the onset of gastro-oesophageal reflux disease symptom relief during the first seven days of treatment. *Scand J Gastroenterol.* **41**, 1132-1140, doi:10.1080/00365520600615781 (2006).
22. Lightdale, C. J. *et al.* A multicenter, randomized, double-blind, 8-week comparative trial of low-dose esomeprazole (20 mg) and standard-dose omeprazole (20 mg) in patients with erosive esophagitis. *Dig Dis Sci.* **51**, 852-857, doi:10.1007/s10620-005-9071-3 (2006).
23. Schmitt, C. *et al.* A multicenter, randomized, double-blind, 8-week comparative trial of standard doses of esomeprazole (40 mg) and omeprazole (20 mg) for the treatment of erosive esophagitis. *Dig Dis Sci.* **51**, 844-850, doi:10.1007/s10620-005-9062-4 (2006).
24. Pace, F. *et al.* Rabeprazole is equivalent to omeprazole in the treatment of erosive gastro-oesophageal reflux disease. A randomised, double-blind, comparative study of rabeprazole and omeprazole 20 mg in acute treatment of reflux oesophagitis, followed by a maintenance open-label, low-dose therapy with rabeprazole. *Dig Liver Dis.* **37**, 741-750, doi:10.1016/j.dld.2005.04.026 (2005).
25. Kahrilas, P. J. *et al.* Efficacy of rabeprazole in the treatment of symptomatic gastroesophageal reflux disease. *Dig Dis Sci.* **50**, 2009-2018, doi:10.1007/s10620-005-3000-3 (2005).

26. Johnson, D. A. *et al.* Effect of esomeprazole on nighttime heartburn and sleep quality in patients with GERD: a randomized, placebo-controlled trial. *Am J Gastroenterol.* **100**, 1914-1922, doi:10.1111/j.1572-0241.2005.00285.x (2005).
27. Fock, K. M. *et al.* Rabeprazole vs esomeprazole in non-erosive gastro-esophageal reflux disease: a randomized, double-blind study in urban Asia. *World J Gastroenterol.* **11**, 3091-3098 (2005).
28. Fennerty, M. B. *et al.* Efficacy of esomeprazole 40 mg vs. lansoprazole 30 mg for healing moderate to severe erosive oesophagitis. *Aliment Pharmacol Ther.* **21**, 455-463, doi:10.1111/j.1365-2036.2005.02339.x (2005).
29. van Zyl, J. *et al.* Efficacy and safety of pantoprazole versus ranitidine in the treatment of patients with symptomatic gastroesophageal reflux disease. *Digestion.* **70**, 61-69, doi:10.1159/000080130 (2004).
30. Gillessen, A. *et al.* 40 mg pantoprazole and 40 mg esomeprazole are equivalent in the healing of esophageal lesions and relief from gastroesophageal reflux disease-related symptoms. *J Clin Gastroenterol.* **38**, 332-340 (2004).
31. Armstrong, D. *et al.* The role of acid suppression in patients with endoscopy-negative reflux disease: the effect of treatment with esomeprazole or omeprazole. *Aliment Pharmacol Ther.* **20**, 413-421, doi:10.1111/j.1365-2036.2004.02085.x (2004).
32. Scholten, T. *et al.* Once-daily pantoprazole 40 mg and esomeprazole 40 mg have equivalent overall efficacy in relieving GERD-related symptoms. *Alimentary Pharmacology and Therapeutics.* **18**, 587-594, doi:10.1046/j.1365-2036.2003.01745.x (2003).
33. Katz, P. O. *et al.* Esomeprazole resolves chronic heartburn in patients without erosive oesophagitis. *Aliment Pharmacol Ther.* **18**, 875-882 (2003).
34. Korner, T. *et al.* Comparable efficacy of pantoprazole and omeprazole in patients with moderate to severe reflux esophagitis. Results of a multinational study. *Digestion.* **67**, 6-13, doi:70201 (2003).
35. Kao, A. W. *et al.* On-demand therapy for Los Angeles grade A and B reflux esophagitis: esomeprazole versus omeprazole. *J Formos Med Assoc.* **102**, 607-612 (2003).
36. Adachi, K. *et al.* Symptom relief in patients with reflux esophagitis: comparative study of omeprazole, lansoprazole, and rabeprazole. *J Gastroenterol Hepatol.* **18**, 1392-1398 (2003).
37. Mulder, C. J. *et al.* A double-blind, randomized comparison of omeprazole Multiple Unit Pellet System (MUPS) 20 mg, lansoprazole 30 mg and pantoprazole 40 mg in symptomatic reflux oesophagitis followed by 3 months of omeprazole MUPS maintenance treatment: a Dutch multicentre trial. *Eur J Gastroenterol Hepatol.* **14**, 649-656 (2002).
38. Miner, P., Jr. *et al.* Rabeprazole in nonerosive gastroesophageal reflux disease: a randomized placebo-controlled trial. *Am J Gastroenterol.* **97**, 1332-1339, doi:10.1111/j.1572-0241.2002.05769.x (2002).

39. Meneghelli, U. G. *et al.* Efficacy and tolerability of pantoprazole versus ranitidine in the treatment of reflux esophagitis and the influence of *Helicobacter pylori* infection on healing rate. *Dis Esophagus*. **15**, 50-56 (2002).
40. Kovacs, T. O. *et al.* Comparison of the efficacy of pantoprazole vs. nizatidine in the treatment of erosive oesophagitis: a randomized, active-controlled, double-blind study. *Aliment Pharmacol Ther*. **16**, 2043-2052 (2002).
41. Holtmann, G. *et al.* A randomized, double-blind, comparative study of standard-dose rabeprazole and high-dose omeprazole in gastro-oesophageal reflux disease. *Aliment Pharmacol Ther*. **16**, 479-485 (2002).
42. Castell, D. O. *et al.* Esomeprazole (40 mg) compared with lansoprazole (30 mg) in the treatment of erosive esophagitis. *Am J Gastroenterol*. **97**, 575-583, doi:10.1111/j.1572-0241.2002.05532.x (2002).
43. Richter, J. E. *et al.* Comparing lansoprazole and omeprazole in onset of heartburn relief: results of a randomized, controlled trial in erosive esophagitis patients. *Am J Gastroenterol*. **96**, 3089-3098, doi:10.1111/j.1572-0241.2001.05263.x (2001).
44. Richter, J. E. *et al.* Efficacy and safety of esomeprazole compared with omeprazole in GERD patients with erosive esophagitis: a randomized controlled trial. *Am J Gastroenterol*. **96**, 656-665, doi:10.1111/j.1572-0241.2001.3600\_b.x (2001).
45. Paul, K. *et al.* Effectiveness and safety of nizatidine, 75 mg, for the relief of episodic heartburn. *Aliment Pharmacol Ther*. **15**, 1571-1577 (2001).
46. Kaspari, S. *et al.* Comparison of pantoprazole 20 mg to ranitidine 150 mg b.i.d. in the treatment of mild gastroesophageal reflux disease. *Digestion*. **63**, 163-170, doi:51885 (2001).
47. Bardhan, K. D. *et al.* Comparable clinical efficacy and tolerability of 20 mg pantoprazole and 20 mg omeprazole in patients with grade I reflux oesophagitis. *Aliment Pharmacol Ther*. **15**, 1585-1591 (2001).
48. Armstrong, D. *et al.* Symptom relief in gastroesophageal reflux disease: a randomized, controlled comparison of pantoprazole and nizatidine in a mixed patient population with erosive esophagitis or endoscopy-negative reflux disease. *Am J Gastroenterol*. **96**, 2849-2857, doi:10.1111/j.1572-0241.2001.4237\_a.x (2001).
49. van Zyl, J. H. *et al.* Efficacy and tolerability of 20 mg pantoprazole versus 300 mg ranitidine in patients with mild reflux-oesophagitis: a randomized, double-blind, parallel, and multicentre study. *Eur J Gastroenterol Hepatol*. **12**, 197-202 (2000).
50. Richter, J. E. *et al.* Efficacy of omeprazole for the treatment of symptomatic acid reflux disease without esophagitis. *Arch Intern Med*. **160**, 1810-1816 (2000).
51. Richter, J. E. *et al.* Oral pantoprazole for erosive esophagitis: a placebo-controlled, randomized clinical trial. Pantoprazole US GERD Study Group. *Am J Gastroenterol*. **95**, 3071-3080, doi:10.1111/j.1572-0241.2000.03254.x (2000).
52. Kahrilas, P. J. *et al.* Esomeprazole improves healing and symptom resolution as compared with omeprazole in reflux oesophagitis patients: a randomized controlled trial. The Esomeprazole Study Investigators. *Aliment Pharmacol Ther*. **14**, 1249-1258 (2000).

53. Fass, R. *et al.* Omeprazole 40 mg once a day is equally effective as lansoprazole 30 mg twice a day in symptom control of patients with gastro-oesophageal reflux disease (GERD) who are resistant to conventional-dose lansoprazole therapy-a prospective, randomized, multi-centre study. *Aliment Pharmacol Ther.* **14**, 1595-1603 (2000).
54. Farley, A. *et al.* Rabeprazole versus ranitidine for the treatment of erosive gastroesophageal reflux disease: a double-blind, randomized clinical trial. Rabeprazole Study Group. *Am J Gastroenterol.* **95**, 1894-1899, doi:10.1111/j.1572-0241.2000.02233.x (2000).
55. Delchier, J. C. *et al.* Rabeprazole, 20 mg once daily or 10 mg twice daily, is equivalent to omeprazole, 20 mg once daily, in the healing of erosive gastroesophageal reflux disease. *Scand J Gastroenterol.* **35**, 1245-1250 (2000).
56. Richter, J. E. *et al.* Lansoprazole in the treatment of heartburn in patients without erosive oesophagitis. *Aliment Pharmacol Ther.* **13**, 795-804 (1999).
57. Pappa, K. A. *et al.* Low-dose ranitidine for the relief of heartburn. *Aliment Pharmacol Ther.* **13**, 459-465 (1999).
58. Pappa, K. A. *et al.* An evaluation of increasing doses of ranitidine for treatment of heartburn. *Aliment Pharmacol Ther.* **13**, 475-481 (1999).
59. Maton, P. N. *et al.* Efficacy of omeprazole versus ranitidine for symptomatic treatment of poorly responsive acid reflux disease-a prospective, controlled trial. *Aliment Pharmacol Ther.* **13**, 819-826 (1999).
60. Jones, R. *et al.* Low-dose lansoprazole provides greater relief of heartburn and epigastric pain than low-dose omeprazole in patients with acid-related dyspepsia. *Aliment Pharmacol Ther.* **13**, 413-419 (1999).
61. Jansen, J. B. *et al.* Standard-dose lansoprazole is more effective than high-dose ranitidine in achieving endoscopic healing and symptom relief in patients with moderately severe reflux oesophagitis. The Dutch Lansoprazole Study Group. *Aliment Pharmacol Ther.* **13**, 1611-1620 (1999).
62. Festen, H. P. *et al.* Omeprazole versus high-dose ranitidine in mild gastroesophageal reflux disease: short- and long-term treatment. The Dutch Reflux Study Group. *Am J Gastroenterol.* **94**, 931-936, doi:10.1111/j.1572-0241.1999.989\_1.x (1999).
63. Galmiche, J. P. *et al.* On-demand treatment of gastro-oesophageal reflux symptoms: a comparison of ranitidine 75 mg with cimetidine 200 mg or placebo. *Aliment Pharmacol Ther.* **12**, 909-917 (1998).
64. Earnest, D. L. *et al.* A placebo-controlled dose-ranging study of lansoprazole in the management of reflux esophagitis. *Am J Gastroenterol.* **93**, 238-243, doi:10.1111/j.1572-0241.1998.00238.x (1998).
65. Dettmer, A. *et al.* Pantoprazole 20 mg is effective for relief of symptoms and healing of lesions in mild reflux oesophagitis. *Aliment Pharmacol Ther.* **12**, 865-872 (1998).
66. Venables, T. L. *et al.* Omeprazole 10 milligrams once daily, omeprazole 20 milligrams once daily, or ranitidine 150 milligrams twice daily, evaluated as initial therapy for the relief of symptoms of gastro-oesophageal reflux disease in general practice. *Scand J Gastroenterol.* **32**, 965-973, doi:10.3109/00365529709011211

(1997).

67. Galimiche, J. P. *et al.* Treating the symptoms of gastro-oesophageal reflux disease: a double-blind comparison of omeprazole and cisapride. *Aliment Pharmacol Ther.* **11**, 765-773 (1997).
68. Bate, C. M. *et al.* Omeprazole is more effective than cimetidine for the relief of all grades of gastro-oesophageal reflux disease-associated heartburn, irrespective of the presence or absence of endoscopic oesophagitis. *Aliment Pharmacol Ther.* **11**, 755-763 (1997).
69. Silver, M. T. *et al.* Ranitidine 300 mg twice daily and 150 mg four-times daily are effective in healing erosive oesophagitis. *Aliment Pharmacol Ther.* **10**, 373-380 (1996).
70. van Rensburg, C. J. *et al.* Efficacy and tolerability of pantoprazole 40 mg versus 80 mg in patients with reflux oesophagitis. *Aliment Pharmacol Ther.* **10**, 397-401 (1996).
71. Mee, A. S. *et al.* Rapid symptom relief in reflux oesophagitis: a comparison of lansoprazole and omeprazole. *Aliment Pharmacol Ther.* **10**, 757-763 (1996).
72. McCarty-Dawson, D. *et al.* Ranitidine versus cimetidine in the healing of erosive esophagitis. *Clin Ther.* **18**, 1150-1160 (1996).
73. Castell, D. O. *et al.* Efficacy and safety of lansoprazole in the treatment of erosive reflux esophagitis. The Lansoprazole Group. *Am J Gastroenterol.* **91**, 1749-1757 (1996).
74. Bate, C. M. *et al.* Reflux symptom relief with omeprazole in patients without unequivocal oesophagitis. *Aliment Pharmacol Ther.* **10**, 547-555 (1996).
75. Robinson, M. *et al.* A comparison of lansoprazole and ranitidine in the treatment of erosive oesophagitis. Multicentre Investigational Group. *Aliment Pharmacol Ther.* **9**, 25-31 (1995).
76. Mossner, J. *et al.* A double-blind study of pantoprazole and omeprazole in the treatment of reflux oesophagitis: a multicentre trial. *Aliment Pharmacol Ther.* **9**, 321-326 (1995).
77. Koop, H. *et al.* Comparative trial of pantoprazole and ranitidine in the treatment of reflux esophagitis. Results of a German multicenter study. *J Clin Gastroenterol.* **20**, 192-195 (1995).
78. Bardhan, K. D. *et al.* Lansoprazole versus ranitidine for the treatment of reflux oesophagitis. UK Lansoprazole Clinical Research Group. *Aliment Pharmacol Ther.* **9**, 145-151 (1995).
79. Simon, T. J. *et al.* Efficacy of twice daily doses of 40 or 20 milligrams famotidine or 150 milligrams ranitidine for treatment of patients with moderate to severe erosive esophagitis. Famotidine Erosive Esophagitis Study Group. *Scand J Gastroenterol.* **28**, 375-380 (1993).
80. Euler, A. R. *et al.* Ranitidine is effective therapy for erosive esophagitis. *Am J Gastroenterol.* **88**, 520-524 (1993).
81. Roufail, W. *et al.* Ranitidine for erosive oesophagitis: a double-blind, placebo-controlled study. Glaxo Erosive Esophagitis Study Group. *Aliment Pharmacol Ther.* **6**,

597-607 (1992).

82. Cloud, M. L. *et al.* Nizatidine versus placebo in gastroesophageal reflux disease. A six-week, multicenter, randomized, double-blind comparison. Nizatidine Gastroesophageal Reflux Disease Study Group. *Dig Dis Sci.* **37**, 865-874 (1992).
83. Sabesin, S. M. *et al.* Famotidine relieves symptoms of gastroesophageal reflux disease and heals erosions and ulcerations. Results of a multicenter, placebo-controlled, dose-ranging study. USA Merck Gastroesophageal Reflux Disease Study Group. *Arch Intern Med.* **151**, 2394-2400 (1991).
84. Robinsen, M. *et al.* Famotidine (20 mg) b.d. relieves gastroesophageal reflux symptoms in patients without erosive oesophagitis. Famotidine/GERD Investigation Group. *Aliment Pharmacol Ther.* **5**, 631-643 (1991).
85. Riemann, J. F. *et al.* Cimetidine suspension in patients with stage 0 gastro-oesophageal reflux disease. *Aliment Pharmacol Ther.* **5**, 191-197 (1991).
86. Quik, R. F. *et al.* A comparison of two doses of nizatidine versus placebo in the treatment of reflux oesophagitis. *Aliment Pharmacol Ther.* **4**, 201-211 (1990).
87. Palmer, R. H. *et al.* Cimetidine 800 mg twice daily for healing erosions and ulcers in gastroesophageal reflux disease. *J Clin Gastroenterol.* **12 Suppl 2**, S29-34 (1990).
88. Lundell, L. *et al.* Omeprazole or high-dose ranitidine in the treatment of patients with reflux oesophagitis not responding to 'standard doses' of H<sub>2</sub>-receptor antagonists. *Aliment Pharmacol Ther.* **4**, 145-155 (1990).
89. Dehn, T. C. *et al.* Double blind comparison of omeprazole (40 mg od) versus cimetidine (400 mg qd) in the treatment of symptomatic erosive reflux oesophagitis, assessed endoscopically, histologically and by 24 h pH monitoring. *Gut.* **31**, 509-513 (1990).
90. Vantrappen, G. *et al.* Omeprazole (40 mg) is superior to ranitidine in short-term treatment of ulcerative reflux esophagitis. *Dig Dis Sci.* **33**, 523-529 (1988).
91. Havelund, T. *et al.* Omeprazole and ranitidine in treatment of reflux oesophagitis: double blind comparative trial. *Br Med J (Clin Res Ed).* **296**, 89-92 (1988).
92. Sontag, S. *et al.* Ranitidine therapy for gastroesophageal reflux disease. Results of a large double-blind trial. *Arch Intern Med.* **147**, 1485-1491 (1987).
93. Wong, W. M. *et al.* A validated symptoms questionnaire (Chinese GERDQ) for the diagnosis of gastro-oesophageal reflux disease in the Chinese population. *Aliment Pharmacol Ther.* **17**, 1407-1413 (2003).
94. Lundell, L. R. *et al.* Endoscopic assessment of oesophagitis: clinical and functional correlates and further validation of the Los Angeles classification. *Gut.* **45**, 172-180 (1999).
95. Ollyo., J. *et al.* Savary-Miller's new endoscopic grading of reflux-oesophagitis: a simple, reproducible, logical, complete and useful classification. *Gastroenterology.* **98**, A-100 (1990).
96. Hetzel, D. J. *et al.* Healing and relapse of severe peptic esophagitis after treatment with omeprazole. *Gastroenterology.* **95**, 903-912 (1988).

**Supplementary Table S2** Adjusting the confounding factors in all outcomes

| <b>Confounding factors</b>                 | <b>Healing</b>         | <b>Relief of symptoms</b> | <b>Tolerance</b>      |
|--------------------------------------------|------------------------|---------------------------|-----------------------|
| <b>Area</b>                                |                        |                           |                       |
| Europe                                     | Ref                    | Ref                       | Ref                   |
| North America                              | 0.674 (-0.324, 1.031)  | -0.101(-0.886, 0.635)     | -0.02(-0.371, 0.319)  |
| Asia                                       | 1.244(-0.875, 3.954)   | -0.448(-1.390, 0.432)     | 0.091(-0.500, 0.672)  |
| Other/mix                                  | -12.87(-66.25, 25.47)  | -2.801(-3.157, 12.10)     | -1.398(-20.7, 15.32)  |
| $\sigma$                                   | 0.832                  | 0.469                     | 0.084                 |
| <b>Gender</b>                              |                        |                           |                       |
| Coefficient                                | -0.127(-0.225, -0.026) | -0.014(-0.036, 0.009)     | 0.010(-0.004, 0.021)  |
| $\sigma$                                   | 0.941                  | 0.462                     | 0.076                 |
| <b>Mean age</b>                            |                        |                           |                       |
| Coefficient                                | -0.130(-0.372, 0.107)  | 0.029(-0.067, 0.131)      | 0.001(-0.060, 0.058)  |
| $\sigma$                                   | 0.996                  | 0.469                     | 0.080                 |
| <b>Level of disease from endoscopy</b>     |                        |                           |                       |
| Coefficient                                | -0.348(-4.953, 4.284)  | NA                        | -0.006(-0.015, 0.005) |
| $\sigma$                                   | 1.013                  | NA                        | 0.090                 |
| <b>Level of disease from symptoms</b>      |                        |                           |                       |
| Coefficient                                | NA                     | 1.275(-1.144, 3.741)      | -0.008(-0.041, 0.240) |
| $\sigma$                                   | NA                     | 0.467                     | 0.079                 |
| <b>Degree of relieve symptoms</b>          |                        |                           |                       |
| Complete relief                            | NA                     | Ref                       | NA                    |
| Relief                                     | NA                     | 0.012(-0.517, 0.543)      | NA                    |
| $\sigma$                                   | NA                     | 0.471                     | NA                    |
| <b>Methodological quality score</b>        |                        |                           |                       |
| Coefficient                                | -1.006(-1.808, -0.213) | -0.048(-0.233, 0.141)     | 0.085(-0.049, 0.218)  |
| $\sigma$                                   | 0.943                  | 0.469                     | 0.081                 |
| <b>Year of publication</b>                 |                        |                           |                       |
| Coefficient                                | -0.046(-0.156, 0.062)  | -0.051(-0.088, 0.012)     | 0.028(0.008, 0.049)   |
| $\sigma$                                   | 1.005                  | 0.433                     | 0.064                 |
| <b>Pharmaceutical industry sponsorship</b> |                        |                           |                       |
| None                                       | Ref                    | Ref                       | Ref                   |
| Sponsorship                                | 0.811(-0.341, 1.955)   | -0.240(-0.808, 0.353)     | 0.100(-0.215, 0.408)  |
| $\sigma$                                   | 0.990                  | 0.464                     | 0.075                 |
| <b>ITT/PP</b>                              |                        |                           |                       |
| ITT                                        | Ref                    | Ref                       | Ref                   |
| PP                                         | 1.249(-0.063, 2.565)   | -0.698(-1.847, 0.460)     | -0.087(-0.626, 0.440) |
| $\sigma$                                   | 0.972                  | 0.464                     | 0.076                 |
| <b>Withdrawal rate</b>                     |                        |                           |                       |
| Coefficient                                | -0.023(-0.002, 0.119)  | 0.021(-0.022, 0.064)      | NA                    |
| $\sigma$                                   | 1.008                  | 0.465                     | NA                    |

Coefficient of posterior median, and 95% credible interval (CrIs) of the between-trial heterogeneity ( $\sigma$ ) in ln(OR) scale for all outcomes using the random effects models; Ref, Reference; NA, Not available. If the coefficient was positive value, the effect was expanded by



corresponding confounding factor in corresponding outcome; Otherwise, the opposite.

**Supplementary Table S3** Adjusting selective design biases and model parameters in all outcomes

| Model                                                           | Healing            | Relief of symptoms | Tolerance          |
|-----------------------------------------------------------------|--------------------|--------------------|--------------------|
| <b>Model: No adjustment</b>                                     |                    |                    |                    |
| PD                                                              | 98.7               | 139.8              | 107.9              |
| D                                                               | 117.1              | 162.3              | 172.7              |
| DIC                                                             | 215.8              | 302.1              | 280.6              |
| $\sigma$                                                        | 0.383              | 0.461              | 0.077              |
| <b>Model 1.1: New favored - Fixed coefficient</b>               |                    |                    |                    |
| Coefficient                                                     | 0.42(-0.91, 1.78)  | -0.17(-1.24, 0.90) | -0.02(-0.49, 0.43) |
| PD                                                              | 96.6               | 140.5              | 108.9              |
| D                                                               | 117.6              | 162.3              | 174.5              |
| DIC                                                             | 214.2              | 302.8              | 283.4              |
| $\sigma$                                                        | 0.327              | 0.464              | 0.078              |
| <b>Model 1.2: New favored - Exchangeable coefficients</b>       |                    |                    |                    |
| Coefficient                                                     | 1.40(-3.00, 5.84)  | 4.27(-2.84, 11.2)  | -0.21(-1.36, 0.96) |
| PD                                                              | 96.3               | 140.2              | 109.5              |
| D                                                               | 118.0              | 162.4              | 174.1              |
| DIC                                                             | 214.3              | 302.6              | 283.6              |
| $\sigma$                                                        | 0.317              | 0.460              | 0.082              |
| <b>Model 1.3: New favored - Consistent coefficients</b>         |                    |                    |                    |
| PD                                                              | 104.2              | 143.3              | 129.2              |
| D                                                               | 121.0              | 161.0              | 184.0              |
| DIC                                                             | 225.2              | 304.3              | 313.2              |
| $\sigma$                                                        | 0.314              | 0.428              | 0.093              |
| <b>Model 2.1: Sponsored favored - Fixed coefficient</b>         |                    |                    |                    |
| Coefficient                                                     | 0.72(-2.84, 4.21)  | -0.74(-5.39, 4.20) | -0.21(-1.36, 0.96) |
| PD                                                              | 96.4               | 140.4              | 109.3              |
| D                                                               | 117.9              | 162.4              | 173.9              |
| DIC                                                             | 214.3              | 302.8              | 283.2              |
| $\sigma$                                                        | 0.326              | 0.466              | 0.081              |
| <b>Model 2.2: Sponsored favored - Exchangeable coefficients</b> |                    |                    |                    |
| Coefficient                                                     | -2.12(-6.38, 2.33) | 0.87(-4.92, 7.53)  | 0.19(-1.02, 1.47)  |
| PD                                                              | 96.6               | 140.7              | 110.7              |
| D                                                               | 117.7              | 162.3              | 175.2              |
| DIC                                                             | 214.3              | 303.0              | 285.9              |
| $\sigma$                                                        | 0.324              | 0.467              | 0.081              |
| <b>Model 2.3: Sponsored favored - Consistent coefficients</b>   |                    |                    |                    |
| PD                                                              | 101.1              | 144.3              | 123.8              |
| D                                                               | 117.0              | 161.5              | 178.8              |
| DIC                                                             | 218.1              | 305.8              | 302.6              |
| $\sigma$                                                        | 0.318              | 0.503              | 0.085              |
| <b>Model 3.1: High-dose favored - Fixed coefficient</b>         |                    |                    |                    |
| Coefficient                                                     | -1.06(-2.79, 0.67) | 0.37(-3.84, 4.79)  | 0.51(-0.60, 1.60)  |
| PD                                                              | 96.3               | 140.3              | 109.7              |

---

|                                                                            |                    |                    |                   |
|----------------------------------------------------------------------------|--------------------|--------------------|-------------------|
| D                                                                          | 117.9              | 162.0              | 173.3             |
| DIC                                                                        | 214.2              | 302.3              | 283.0             |
| $\sigma$                                                                   | 0.321              | 0.464              | 0.084             |
| <b>Model 3.2: High-dose favored - Exchangeable coefficients</b>            |                    |                    |                   |
| Coefficient                                                                | -1.33(-6.40, 3.32) | -0.33(-4.94, 4.28) | 0.25(-1.04, 1.69) |
| PD                                                                         | 96.7               | 140.4              | 110.1             |
| D                                                                          | 117.4              | 162.4              | 174.1             |
| DIC                                                                        | 214.1              | 302.8              | 284.2             |
| $\sigma$                                                                   | 0.327              | 0.465              | 0.080             |
| <b>Model 3.3: High-dose favored - Consistent coefficients</b>              |                    |                    |                   |
| PD                                                                         | 102.4              | 142.0              | 119.2             |
| D                                                                          | 118.8              | 161.2              | 179.3             |
| DIC                                                                        | 220.2              | 303.2              | 298.5             |
| $\sigma$                                                                   | 0.322              | 0.475              | 0.084             |
| <b>Model 4.1: PPIs favored - Fixed coefficient</b>                         |                    |                    |                   |
| Coefficient                                                                | 1.14(-1.36, 3.64)  | 4.49(1.26, 7.85)   | 0.35(-0.72, 1.45) |
| PD                                                                         | 96.2               | 138.3              | 109.7             |
| D                                                                          | 118.1              | 163.1              | 174.0             |
| DIC                                                                        | 214.3              | 301.4              | 283.7             |
| $\sigma$                                                                   | 0.323              | 0.422              | 0.083             |
| <b>Model 4.2: PPIs favored - Exchangeable coefficients</b>                 |                    |                    |                   |
| Coefficient                                                                | 1.98(-3.10, 6.98)  | 2.29(1.32, 7.55)   | 0.41(-0.71, 1.62) |
| PD                                                                         | 96.1               | 139.8              | 108.3             |
| D                                                                          | 118.6              | 162.1              | 173.6             |
| DIC                                                                        | 214.7              | 301.9              | 281.9             |
| $\sigma$                                                                   | 0.316              | 0.459              | 0.078             |
| <b>Model 4.3: PPIs favored - Consistent coefficients</b>                   |                    |                    |                   |
| PD                                                                         | 100.9              | 140.3              | 111.8             |
| D                                                                          | 118.7              | 162.8              | 174.6             |
| DIC                                                                        | 219.6              | 303.1              | 286.4             |
| $\sigma$                                                                   | 0.302              | 0.442              | 0.080             |
| <b>Model 5.1: Supplementary merger favored - Fixed coefficient</b>         |                    |                    |                   |
| Coefficient                                                                | 1.14(-1.36, 3.64)  | 3.98(-1.04, 6.89)  | 0.10(-0.67, 0.89) |
| PD                                                                         | 96.2               | 138.3              | 109.7             |
| D                                                                          | 118.1              | 163.6              | 174.6             |
| DIC                                                                        | 214.3              | 301.9              | 284.3             |
| $\sigma$                                                                   | 0.323              | 0.421              | 0.083             |
| <b>Model 5.2: Supplementary merger favored - Exchangeable coefficients</b> |                    |                    |                   |
| Coefficient                                                                | 1.98(-3.10, 6.98)  | 0.87(-4.92, 7.53)  | 0.19(-1.00, 1.47) |
| PD                                                                         | 96.1               | 140.7              | 110.7             |
| D                                                                          | 118.6              | 162.3              | 175.2             |
| DIC                                                                        | 214.7              | 303.0              | 285.9             |
| $\sigma$                                                                   | 0.316              | 0.467              | 0.08              |
| <b>Model 5.3: Supplementary merger favored - Consistent coefficients</b>   |                    |                    |                   |

---

|          |       |       |       |
|----------|-------|-------|-------|
| PD       | 100.9 | 143.4 | 124.3 |
| D        | 118.7 | 162.3 | 181.0 |
| DIC      | 219.6 | 305.7 | 305.3 |
| $\sigma$ | 0.302 | 0.470 | 0.097 |

Medians and 95% credible intervals from the posterior distributions of the heterogeneity ( $\sigma$ ), two small-study effects coefficients in  $\ln(\text{OR})$  scale for all outcomes. Deviance information criterion (DIC) and posterior mean of the residual deviance (D) are also reported. Model 5 provide different merger favored in different outcomes, sponsored favored and high-dose favored for the healing rate, PPIs favored and sponsored favored for relief of symptoms, sponsored and PPIs favored for tolerance. If coefficient is found positive, it means that there are small-study effects in the direction of design bias, otherwise the opposite.

**Supplementary Table S4** The results of compare models in all outcomes

|          | Healing |       |       |       | Relief of symptoms |       |                   | Tolerance |       |       |
|----------|---------|-------|-------|-------|--------------------|-------|-------------------|-----------|-------|-------|
|          | NM0     | HM1   | HM2   | HM3   | NM0                | HM1   | HM4               | NM0       | HM1   | HM5   |
| PD       | 98.7    | 91.7  | 90.1  | 92.0  | 139.8              | 132.1 | 132.7             | 107.9     | 91.6  | 89.5  |
| D        | 117.1   | 117.0 | 116.6 | 116.7 | 162.3              | 165.1 | 165.2             | 172.7     | 171.3 | 164.2 |
| DIC      | 215.8   | 208.7 | 206.7 | 208.7 | 302.1              | 297.2 | 297.9             | 280.6     | 262.9 | 253.7 |
| $\sigma$ | 0.383   | 0.334 | 0.306 | 0.332 | 0.461              | 0.418 | 0.410*;<br>0.107# | 0.077     | 0.066 | 0.055 |

NM0: No-adjustment model;

HM1: The hierarchical modeling approach incorporating dose-related and PPI favored constraints;

HM2: The hierarchical modeling approach incorporating dose-related and PPI favored constraints with gender;

HM3: The hierarchical modeling approach incorporating dose-related and PPI favored constraints with methodological quality score;

HM4: The hierarchical modeling approach incorporating dose-related and PPI favored constraints with inconsistency;

HM5: The hierarchical modeling approach incorporating dose-related and PPI favored constraints with year of publication.

PD: number of parameters, D: posterior mean of the residual deviance, DIC: deviance information criterion,  $\sigma$ : Heterogeneity/Inconsistency, \* indicates heterogeneity, # indicates inconsistency.



|                     |                    |                           |                    |    |                    |    |                    |    |                  |    |                     |                  |                   |    |
|---------------------|--------------------|---------------------------|--------------------|----|--------------------|----|--------------------|----|------------------|----|---------------------|------------------|-------------------|----|
|                     |                    | <b>Relief of symptoms</b> | 3.42(2.31, 4.65)   | 14 | 3.40(2.37, 4.71)   | 14 | NA                 | NA | NA               | NA | NA                  | 3.37(2.17, 4.77) | 14                |    |
|                     |                    | <b>Tolerance</b>          | 0.66(0.54, 0.83)   | 15 | 0.67(0.55, 0.81)   | 15 | 0.67(0.59, 0.81)   | 15 | 0.65(0.52, 0.80) | 16 | 0.67(0.58, 0.74)    | 15               | 0.66(0.54, 0.78)  | 12 |
|                     | <b>20mg/day</b>    | <b>Healing</b>            | 10.18(6.93, 14.48) | 10 | 10.02(5.96,13.84)  | 10 | 9.87(5.92, 13.91)  | 10 | NA               | NA | 9.51(6.04, 12.54)   | 11               | 11.41(5.81,13.87) | 10 |
|                     |                    | <b>Relief of symptoms</b> | 4.21(3.22, 5.46)   | 7  | 4.31(3.37, 5.63)   | 8  | NA                 | NA | NA               | NA | NA                  | NA               | 4.17(3.19, 5.47)  | 7  |
|                     |                    | <b>Tolerance</b>          | 0.61(0.51, 0.72)   | 6  | 0.62(0.54, 0.71)   | 7  | 0.63(0.59, 0.72)   | 6  | 0.62(0.57, 0.73) | 6  | 0.62(0.51, 0.70)    | 5                | 0.63(0.53, 0.71)  | 6  |
|                     | <b>40mg/day</b>    | <b>Healing</b>            | 14.93(9.56, 23.12) | 3  | 13.73(9.48, 21.46) | 4  | 13.77(8.56, 22.9)  | 4  | NA               | NA | 11.69(8.2141, 23.4) | 4                | 13.71(8.65, 24.6) | 5  |
|                     |                    | <b>Relief of symptoms</b> | 5.70(3.74, 9.52)   | 1  | 5.72(3.91, 9.78)   | 1  | NA                 | NA | NA               | NA | NA                  | NA               | 5.54(3.58, 8.43)  | 1  |
|                     |                    | <b>Tolerance</b>          | 0.57(0.44, 0.69)   | 1  | 0.57(0.52, 0.70)   | 1  | 0.55(0.53, 0.68)   | 1  | 0.57(0.47, 0.70) | 1  | 0.60(0.46, 0.67)    | 1                | 0.62(0.51, 0.71)  | 1  |
| <b>Pantoprazole</b> | <b>10-20mg/day</b> | <b>Healing</b>            | 6.88(4.23, 10.82)  | 13 | 6.84(4.32, 9.75)   | 13 | 5.78(4.32, 9.57)   | 13 | NA               | NA | 5.96(2.89, 8.73)    | 12               | 5.23(3.79, 8.95)  | 13 |
|                     |                    | <b>Relief of symptoms</b> | 3.54(2.40, 4.76)   | 13 | 3.58(2.41, 4.89)   | 12 | NA                 | NA | NA               | NA | NA                  | NA               | 3.43(2.43, 4.98)  | 13 |
|                     |                    | <b>Tolerance</b>          | 0.64(0.53, 0.78)   | 12 | 0.65(0.59, 0.76)   | 12 | 0.67(0.60, 0.78)   | 12 | 0.64(0.58, 0.77) | 12 | 0.65(0.52, 0.76)    | 11               | 0.65(0.59, 0.73)  | 10 |
|                     | <b>40mg/day</b>    | <b>Healing</b>            | 11.64(8.16, 16.05) | 9  | 10.20(7.98, 15.7)  | 9  | 11.77(6.91, 17.31) | 9  | NA               | NA | 10.96(7.65, 16.97)  | 7                | 9.98(6.78,15.20)  | 9  |
|                     |                    | <b>Relief of symptoms</b> | 4.19(3.10, 5.58)   | 8  | 4.32(3.27, 6.04)   | 6  | NA                 | NA | NA               | NA | NA                  | NA               | 4.14(3.24, 5.63)  | 8  |
|                     |                    | <b>Tolerance</b>          | 0.59(0.48, 0.70)   | 2  | 0.60(0.51, 0.71)   | 2  | 0.61(0.52, 0.70)   | 2  | 0.60(0.51, 0.73) | 3  | 0.58(0.50, 0.70)    | 3                | 0.61(0.54, 0.69)  | 3  |
|                     | <b>80mg/day</b>    | <b>Healing</b>            | 14.74(9.42, 23.30) | 4  | 14.31(8.29, 21.91) | 3  | 13.86(9.33, 21.70) | 3  | NA               | NA | 13.54(9.14, 20.15)  | 3                | 12.21(7.82,19.7)  | 3  |
|                     |                    | <b>Relief of symptoms</b> | 4.95(3.43, 7.71)   | 3  | 5.14(3.67, 7.73)   | 2  | NA                 | NA | NA               | NA | NA                  | NA               | 4.64(3.51, 7.79)  | 3  |
|                     |                    | <b>Tolerance</b>          | NA                 | NA | NA                 | NA | NA                 | NA | NA               | NA | NA                  | NA               | NA                | NA |
| <b>Rabeprazole</b>  | <b>5-10mg/day</b>  | <b>Healing</b>            | 9.56(5.63, 14.62)  | 11 | 9.54(5.31, 13.12)  | 11 | 8.97(5.32, 12.84)  | 11 | NA               | NA | 8.63(3.54, 12.91)   | 10               | 8.49(4.32,12.97)  | 11 |
|                     |                    | <b>Relief of symptoms</b> | 3.61(2.50, 4.83)   | 12 | 3.47(2.64, 4.74)   | 13 | NA                 | NA | NA               | NA | NA                  | NA               | 3.53(2.37, 4.78)  | 12 |
|                     |                    | <b>Tolerance</b>          | 0.67(0.55, 0.84)   | 17 | 0.67(0.58, 0.79)   | 17 | 0.68(0.58, 0.81)   | 17 | 0.67(0.59, 0.81) | 17 | 0.66(0.54, 0.78)    | 18               | 0.67(0.59, 0.81)  | 11 |

|            |               |                    |                    |    |                    |    |                    |    |                  |    |                    |    |                    |                  |    |
|------------|---------------|--------------------|--------------------|----|--------------------|----|--------------------|----|------------------|----|--------------------|----|--------------------|------------------|----|
| Cimetidine | 20mg/day      | Healing            | 12.04(7.78, 17.95) | 7  | 11.42(7.94, 17.32) | 7  | 12.45(6.36, 16.97) | 7  | NA               | NA | 11.72(4.77, 17.20) | 6  | 11.79(5.93, 17.94) | 7                |    |
|            |               | Relief of symptoms | 4.09(3.01, 5.39)   | 9  | 4.06(3.07, 5.47)   | 9  | NA                 | NA | NA               | NA | NA                 | NA | NA                 | 3.91(2.90, 5.43) | 9  |
|            |               | Tolerance          | 0.64(0.53, 0.76)   | 11 | 0.65(0.55, 0.72)   | 11 | 0.62(0.53, 0.74)   | 11 | 0.64(0.54, 0.72) | 11 | 0.63(0.50, 0.71)   | 8  | 0.64(0.57, 0.72)   | 8                |    |
|            | 40-50mg/day   | Healing            | 15.07(9.58, 23.51) | 2  | 15.24(9.23, 22.41) | 2  | 15.51(8.35, 20.4)  | 2  | NA               | NA | 14.88(7.78, 22.41) | 2  | 15.32(7.35, 22.95) | 2                |    |
|            |               | Relief of symptoms | 4.74(3.39, 6.93)   | 4  | 4.72(3.45, 7.02)   | 4  | NA                 | NA | NA               | NA | NA                 | NA | 4.47(3.72, 6.82)   | 4                |    |
|            |               | Tolerance          | 0.60(0.49, 0.72)   | 5  | 0.62(0.52, 0.71)   | 4  | 0.63(0.51, 0.72)   | 7  | 0.62(0.52, 0.74) | 4  | 0.62(0.50, 0.71)   | 4  | 0.62(0.51, 0.72)   | 4                |    |
|            | 200-400mg/day | Healing            | NA                 | NA | NA                 | NA | NA                 | NA | NA               | NA | NA                 | NA | NA                 | NA               | NA |
|            |               | Relief of symptoms | 1.40(0.92, 1.93)   | 24 | 1.38(0.91, 1.92)   | 24 | NA                 | NA | NA               | NA | NA                 | NA | NA                 | NA               | NA |
|            |               | Tolerance          | 0.75(0.61, 0.97)   | 23 | 0.75(0.62, 0.95)   | 23 | 0.77(0.66, 0.97)   | 23 | 0.76(0.64, 0.94) | 22 | 0.74(0.65, 0.93)   | 22 | NA                 | NA               |    |
|            | 600-800mg/day | Healing            | NA                 | NA | NA                 | NA | NA                 | NA | NA               | NA | NA                 | NA | NA                 | NA               | NA |
|            |               | Relief of symptoms | 1.65(1.17, 2.38)   | 20 | 1.60(1.12, 2.32)   | 20 | NA                 | NA | NA               | NA | NA                 | NA | NA                 | NA               | NA |
|            |               | Tolerance          | 0.69(0.58, 0.86)   | 21 | 0.72(0.60, 0.85)   | 20 | 0.72(0.61, 0.86)   | 21 | NA               | NA | 0.72(0.62, 0.84)   | 20 | NA                 | NA               |    |
|            | 1600mg/day    | Healing            | 2.87(1.81, 4.28)   | 19 | 2.54(1.57, 4.14)   | 18 | 2.57(1.83, 4.52)   | 19 | NA               | NA | 1.57(1.01, 2.72)   | 18 | NA                 | NA               |    |
|            |               | Relief of symptoms | 1.89(1.31, 2.95)   | 16 | 1.82(1.31, 3.41)   | 16 | NA                 | NA | NA               | NA | NA                 | NA | NA                 | NA               |    |
|            |               | Tolerance          | 0.65(0.54, 0.81)   | 13 | 0.71(0.54, 0.82)   | 13 | 0.68(0.60, 0.83)   | 13 | 0.67(0.58, 0.79) | 13 | 0.70(0.58, 0.82)   | 12 | NA                 | NA               |    |
| Famotidine | 20mg/day      | Healing            | NA                 | NA | NA                 | NA | NA                 | NA | NA               | NA | NA                 | NA | NA                 | NA               |    |
|            |               | Relief of symptoms | 1.46(0.97, 2.00)   | 23 | 1.43(0.90, 2.01)   | 23 | NA                 | NA | NA               | NA | NA                 | NA | 1.44(0.97, 2.18)   | 21               |    |
|            |               | Tolerance          | 0.72(0.58, 0.94)   | 22 | 0.75(0.62, 0.91)   | 22 | 0.74(0.63, 0.92)   | 22 | 0.72(0.60, 0.90) | 21 | 0.73(0.62, 0.88)   | 21 | 0.72(0.62, 0.89)   | 16               |    |
|            | 40mg/day      | Healing            | 4.15(2.57, 6.42)   | 16 | 3.84(2.18, 5.47)   | 16 | 4.95(1.78, 6.64)   | 16 | NA               | NA | NA                 | NA | 3.97(1.98, 5.78)   | 16               |    |
|            |               | Relief of symptoms | 1.71(1.25, 2.36)   | 19 | 1.65(1.20, 2.33)   | 19 | NA                 | NA | NA               | NA | NA                 | NA | 1.69(1.32, 2.24)   | 18               |    |



|            |                  |                    |                  |                  |                  |                  |                  |                  |                  |                  |                  |                  |                  |    |    |
|------------|------------------|--------------------|------------------|------------------|------------------|------------------|------------------|------------------|------------------|------------------|------------------|------------------|------------------|----|----|
| Nizatidine | 80mg/day         | Tolerance          | 0.66(0.55, 0.80) | 14               | 0.70(0.60, 0.82) | 14               | 0.71(0.61, 0.80) | 14               | 0.67(0.57, 0.79) | 14               | 0.68(0.56, 0.81) | 16               | 0.69(0.57, 0.75) | 13 |    |
|            |                  | Healing            | 4.71(2.87, 7.38) | 14               | 4.26(2.65, 6.24) | 14               | 3.92(2.84, 6.21) | 14               | NA               | NA               | NA               | NA               | 3.70(2.91, 5.97) | 14 |    |
|            |                  | Relief of symptoms | 1.96(1.38, 2.95) | 15               | 1.91(1.37, 3.00) | 15               | NA               | NA               | NA               | NA               | NA               | NA               | 1.90(1.37, 3.08) | 15 |    |
|            | 150mg/day        | Tolerance          | NA               | NA               | NA               | NA               | NA               | NA               | NA               | NA               | NA               | NA               | NA               | NA | NA |
|            |                  | Healing            | NA               | NA               | NA               | NA               | NA               | NA               | NA               | NA               | NA               | NA               | NA               | NA | NA |
|            |                  | Relief of symptoms | 1.53(1.02, 2.18) | 22               | 1.50(1.04, 2.26) | 22               | NA               | NA               | NA               | NA               | NA               | NA               | 1.52(1.07, 2.13) | 20 |    |
|            | 300mg/day        | Tolerance          | NA               | NA               | NA               | NA               | NA               | NA               | NA               | NA               | NA               | NA               | NA               | NA | NA |
|            |                  | Healing            | 2.46(1.66, 3.52) | 21               | 2.72(1.65, 3.34) | 20               | 2.75(1.70, 3.32) | 21               | NA               | NA               | 2.80(1.73, 3.47) | 17               | 2.93(1.71, 3.68) | 19 |    |
|            |                  | Relief of symptoms | 1.82(1.25, 2.82) | 17               | 1.86(1.27, 2.74) | 17               | NA               | NA               | NA               | NA               | NA               | NA               | 1.79(1.23, 2.72) | 16 |    |
|            | 600mg/day        | Tolerance          | 0.69(0.56, 0.87) | 20               | 0.71(0.64, 0.85) | 21               | 0.73(0.63, 0.91) | 20               | 0.72(0.61, 0.87) | 20               | 0.71(0.59, 0.89) | 17               | 0.72(0.59, 0.82) | 18 |    |
|            |                  | Healing            | 3.01(1.99, 4.44) | 18               | 3.72(1.78, 3.78) | 17               | 3.58(1.79, 3.54) | 17               | NA               | NA               | 3.03(1.94, 3.66) | 14               | 2.78(1.86, 3.65) | 17 |    |
|            |                  | Relief of symptoms | NA               | NA               | NA               | NA               | NA               | NA               | NA               | NA               | NA               | NA               | NA               | NA |    |
| Ranitidine | ≤300mg/day       | Tolerance          | 0.63(0.51, 0.77) | 9                | 0.65(0.56, 0.79) | 9                | 0.67(0.58, 0.80) | 9                | 0.68(0.57, 0.78) | 10               | NA               | NA               | 0.68(0.59, 0.75) | 9  |    |
|            |                  | Healing            | 2.90(2.06, 3.83) | 20               | 2.77(1.99, 3.82) | 21               | 2.29(1.76, 3.18) | 20               | NA               | NA               | 2.57(2.26, 2.84) | 16               | 2.19(1.52, 3.48) | 20 |    |
|            |                  | Relief of symptoms | 1.56(1.18, 2.03) | 21               | 1.54(1.17, 2.09) | 21               | NA               | NA               | NA               | NA               | NA               | NA               | 1.54(1.17, 2.14) | 19 |    |
|            | 600mg/day        | Tolerance          | 0.67(0.57, 0.78) | 18               | 0.71(0.54, 0.90) | 19               | 0.68(0.58, 0.80) | 19               | 0.71(0.60, 0.81) | 18               | 0.68(0.61, 0.78) | 14               | 0.68(0.63, 0.76) | 17 |    |
|            |                  | Healing            | 3.44(2.54, 4.64) | 17               | 3.64(2.73, 4.45) | 19               | 2.99(1.65, 4.76) | 18               | NA               | NA               | 2.89(2.45, 3.46) | 15               | 2.97(1.56, 3.62) | 18 |    |
|            |                  | Relief of symptoms | 1.75(1.28, 2.47) | 18               | 1.70(1.29, 2.41) | 18               | NA               | NA               | NA               | NA               | NA               | NA               | 1.71(1.22, 2.31) | 17 |    |
| 1200mg/day | Tolerance        | 0.61(0.49, 0.73)   | 8                | 0.64(0.51, 0.81) | 8                | 0.63(0.53, 0.77) | 8                | 0.61(0.51, 0.72) | 8                | 0.62(0.49, 0.73) | 7                | 0.64(0.50, 0.70) | 20               |    |    |
| Healing    | 4.05(2.86, 5.85) | 15                 | 3.78(2.92, 5.17) | 15               | 3.97(2.13, 5.32) | 15               | NA               | NA               | 3.96(2.21, 4.98) | 13               | 3.87(2.34, 5.27) | 15               |                  |    |    |

|                             |                           |                                          |    |                                          |    |                   |    |                   |    |                   |    |                                          |    |
|-----------------------------|---------------------------|------------------------------------------|----|------------------------------------------|----|-------------------|----|-------------------|----|-------------------|----|------------------------------------------|----|
|                             | <b>Relief of symptoms</b> | NA                                       | NA | NA                                       | NA | NA                | NA | NA                | NA | NA                | NA | NA                                       | NA |
|                             | <b>Tolerance</b>          | 0.58(0.44, 0.71)                         | 4  | 0.61(0.49, 0.75)                         | 5  | 0.57(0.51, 0.73)  | 4  | 0.61(0.57, 0.73)  | 7  | 0.61(0.53, 0.75)  | 10 | 0.59(0.54, 0.72)                         | 19 |
| <b>Placebo</b>              | <b>Healing</b>            | Ref                                      | 22 | Ref                                      | 22 | Ref               | 22 | NA                | NA | Ref               | 19 | Ref                                      | 21 |
|                             | <b>Relief of symptoms</b> | Ref                                      | 25 | Ref                                      | 25 | NA                | NA | NA                | NA | NA                | NA | Ref                                      | 22 |
|                             | <b>Tolerance</b>          | Ref                                      | 24 | Ref                                      | 24 | Ref               | 24 | Ref               | 23 | Ref               | 23 | Ref                                      | 21 |
| <b>Heterogeneity</b>        | <b>Healing</b>            | 0.33(0.22, 0.47)                         |    | 0.33(0.28, 0.43)                         |    | 0.34(0.23, 0.42)  |    | NA                |    | 0.34(0.16, 0.46)  |    | 0.33(0.22, 0.41)                         |    |
|                             | <b>Relief of symptoms</b> | 0.41(0.31, 0.41)*;<br>0.11(0.004, 0.29)# |    | 0.38(0.30, 0.42)*;<br>0.11(0.006, 0.28)# |    | NA                |    | NA                |    | NA                |    | 0.43(0.33, 0.53)*;<br>0.11(0.006, 0.28)# |    |
|                             | <b>Tolerance</b>          | 0.07(0.002, 0.17)                        |    | 0.06(0.002, 0.13)                        |    | 0.07(0.003, 0.14) |    | 0.07(0.003, 0.14) |    | 0.08(0.005, 0.16) |    | 0.06(0.003, 0.18)                        |    |
| <b>Heterogeneity change</b> | <b>Healing</b>            | Ref                                      |    | 0%                                       |    | ↑3.0%             |    | NA                |    | ↑3.0%             |    | 0%                                       |    |
|                             | <b>Relief of symptoms</b> | Ref                                      |    | ↓7.3%; 0%                                |    | NA                |    | NA                |    | NA                |    | ↑4.9%; 0%                                |    |
|                             | <b>Tolerance</b>          | Ref                                      |    | ↓14.3%                                   |    | 0%                |    | 0%                |    | ↑14.3%            |    | ↓14.3%                                   |    |

Ref: Reference, NA: Not available, \* indicates heterogeneity, # indicates inconsistency.

**Supplementary Table S9** Estimates of effects and quality ratings for comparison of recommended doses of different drugs from the main outcome (healing) based on the GRADE system

| Comparisons                      | Direct evidence   |                     | Indirect evidence    |                     | Network meta-analysis |                     |
|----------------------------------|-------------------|---------------------|----------------------|---------------------|-----------------------|---------------------|
|                                  | OR 95%CrIs        | Quality of evidence | OR 95%CrIs           | Quality of evidence | OR 95%CrIs            | Quality of evidence |
| Esomeprazole 20mg VS. Placebo    | —                 | —                   | 11.67(7.33, 17.66)   | LOW**               | 11.67(7.33, 17.66)    | LOW                 |
| Esomeprazole 40mg VS. Placebo    | —                 | —                   | 15.45(10.24, 21.96)  | LOW**               | 15.45(10.24, 21.96)   | LOW                 |
| Lansoprazole 15mg VS. Placebo    | 6.28 (4.33, 9.11) | MODERATE※           | 12.14(3.13, 26.43)   | LOW**               | 8.23(4.87, 12.79)     | LOW‡‡               |
| Lansoprazole 30mg VS. Placebo    | 11.9 (6.78, 21.0) | LOW†,※              | 12.53(8.18, 19.21)   | VERY LOW**          | 12.30(8.60, 17.03)    | LOW                 |
| Lansoprazole 60mg VS. Placebo    | 8.78 (3.77, 20.5) | MODERATE※           | 16.15(10.26, 25.42)  | VERY LOW**          | 14.10(9.44, 21.09)    | MODERATE            |
| Omeprazole 20mg VS. Placebo      | 14.3 (9.55, 21.4) | MODERATE†           | 2.04(0.86, 4.84)     | VERY LOW**          | 10.18(6.93, 14.48)    | MODERATE            |
| Omeprazole 40mg VS. Placebo      | —                 | —                   | 14.93(9.56, 23.12)   | MODERATE¶           | 14.93(9.56, 23.12)    | MODERATE            |
| Pantoprazole 10-20mg VS. Placebo | 4.35 (2.60, 7.26) | HIGH                | 67.98(21.58, 214.20) | VERY LOW**          | 6.88(4.23, 10.82)     | HIGH                |
| Pantoprazole 40mg VS. Placebo    | 14.7 (7.71, 28.2) | HIGH                | 10.63(7.17, 15.76)   | LOW**               | 11.64(8.16, 16.05)    | HIGH                |
| Pantoprazole 80mg VS. Placebo    | —                 | —                   | 14.74(9.42, 23.30)   | LOW**               | 14.74(9.42, 23.30)    | LOW                 |
| Rabeprazole 5-10mg VS. Placebo   | —                 | —                   | 9.56(5.63, 14.62)    | LOW**               | 9.56(5.63, 14.62)     | LOW                 |
| Rabeprazole 20mg VS. Placebo     | —                 | —                   | 12.04(7.78, 17.95)   | MODERATE¶           | 12.04(7.78, 17.95)    | MODERATE            |
| Rabeprazole 40-50mg VS. Placebo  | —                 | —                   | 15.07(9.58, 23.51)   | LOW**               | 15.07(9.58, 23.51)    | LOW                 |
| Cimetidine 1600mg VS. Placebo    | 4.15 (2.13, 8.09) | MODERATE※           | 2.21(1.26, 3.88)     | LOW¶,‡              | 2.87(1.81, 4.28)      | MODERATE            |
| Famotidine 40mg VS. Placebo      | 11.6 (5.90, 22.9) | LOW‡,※              | 1.76(0.94, 3.26)     | VERY LOW**.,‡       | 4.15(2.57, 6.42)      | VERY LOW‡‡          |
| Famotidine 80mg VS. Placebo      | —                 | —                   | 4.71(2.87, 7.38)     | VERY LOW**          | 4.71(2.87, 7.38)      | VERY LOW            |
| Nizatidine 300mg VS. Placebo     | 1.63 (1.01, 2.61) | LOW†,※              | 4.91(2.65, 9.08)     | VERY LOW**          | 2.46(1.66, 3.52)      | LOW                 |
| Nizatidine 600mg VS. Placebo     | 1.84 (1.28, 2.63) | MODERATE※           | 4.16(1.84, 9.40)     | VERY LOW**          | 3.01(1.99, 4.44)      | MODERATE            |
| Ranitidine ≤300mg VS. Placebo    | 1.86 (0.96, 3.60) | VERY LOW†,§,※       | 3.29(2.31, 4.67)     | LOW**               | 2.90(2.06, 3.83)      | LOW                 |
| Ranitidine 600mg VS. Placebo     | 3.73 (2.05, 6.79) | MODERATE†           | 3.35(2.36, 4.74)     | LOW**               | 3.44(2.54, 4.64)      | MODERATE            |
| Ranitidine 1200mg VS. Placebo    | 4.22 (2.84, 6.27) | HIGH                | 3.37(1.46, 7.78)     | LOW**               | 4.05(2.86, 5.85)      | HIGH                |

|                                            |                   |                       |                   |                            |                   |                       |
|--------------------------------------------|-------------------|-----------------------|-------------------|----------------------------|-------------------|-----------------------|
| Esomeprazole 40mg VS. Esomeprazole 20mg    | 1.76 (1.17, 2.66) | LOW <sup>‡,※</sup>    | 0.84(0.48, 1.45)  | VERY LOW <sup>** ,‡</sup>  | 1.35(1.02, 1.97)  | LOW                   |
| Lansoprazole 15mg VS. Esomeprazole 20mg    | —                 | —                     | 0.73(0.40, 1.14)  | VERY LOW <sup>** ,‡</sup>  | 0.73(0.40, 1.14)  | VERY LOW              |
| Lansoprazole 30mg VS. Esomeprazole 20mg    | —                 | —                     | 1.08(0.75, 1.58)  | VERY LOW <sup>** ,‡</sup>  | 1.08(0.75, 1.58)  | VERY LOW              |
| Lansoprazole 60mg VS. Esomeprazole 20mg    | —                 | —                     | 1.24(0.82, 1.90)  | VERY LOW <sup>** ,‡</sup>  | 1.24(0.82, 1.90)  | VERY LOW              |
| Omeprazole 20mg VS. Esomeprazole 20mg      | 0.74 (0.59, 0.93) | LOW <sup>‡,※</sup>    | 1.55(1.15, 2.08)  | LOW <sup>**</sup>          | 0.89(0.62, 1.25)  | VERY LOW <sup>‡</sup> |
| Omeprazole 40mg VS. Esomeprazole 20mg      | —                 | —                     | 1.32(0.81, 2.17)  | VERY LOW <sup>** ,‡</sup>  | 1.32(0.81, 2.17)  | VERY LOW              |
| Pantoprazole 10-20mg VS. Esomeprazole 20mg | —                 | —                     | 0.61(0.34, 0.998) | VERY LOW <sup>** ,‡‡</sup> | 0.61(0.34, 0.998) | VERY LOW              |
| Pantoprazole 40mg VS. Esomeprazole 20mg    | —                 | —                     | 1.03(0.70, 1.50)  | VERY LOW <sup>** ,‡</sup>  | 1.03(0.70, 1.50)  | VERY LOW              |
| Pantoprazole 80mg VS. Esomeprazole 20mg    | —                 | —                     | 1.30(0.82, 2.18)  | VERY LOW <sup>** ,‡</sup>  | 1.30(0.82, 2.18)  | VERY LOW              |
| Rabeprazole 5-10mg VS. Esomeprazole 20mg   | —                 | —                     | 0.84(0.47, 1.31)  | VERY LOW <sup>** ,‡</sup>  | 0.84(0.47, 1.31)  | VERY LOW              |
| Rabeprazole 20mg VS. Esomeprazole 20mg     | —                 | —                     | 1.06(0.67, 1.59)  | VERY LOW <sup>** ,‡</sup>  | 1.06(0.67, 1.59)  | VERY LOW              |
| Rabeprazole 40-50mg VS. Esomeprazole 20mg  | —                 | —                     | 1.32(0.86, 2.07)  | VERY LOW <sup>** ,‡</sup>  | 1.32(0.86, 2.07)  | VERY LOW              |
| Cimetidine 1600mg VS. Esomeprazole 20mg    | —                 | —                     | 0.26(0.14, 0.42)  | LOW <sup>**</sup>          | 0.26(0.14, 0.42)  | LOW                   |
| Famotidine 40mg VS. Esomeprazole 20mg      | —                 | —                     | 0.37(0.21, 0.63)  | LOW <sup>**</sup>          | 0.37(0.21, 0.63)  | LOW                   |
| Famotidine 80mg VS. Esomeprazole 20mg      | —                 | —                     | 0.42(0.23, 0.74)  | VERY LOW <sup>**</sup>     | 0.42(0.23, 0.74)  | VERY LOW              |
| Nizatidine 300mg VS. Esomeprazole 20mg     | —                 | —                     | 0.22(0.13, 0.35)  | LOW <sup>**</sup>          | 0.22(0.13, 0.35)  | LOW                   |
| Nizatidine 600mg VS. Esomeprazole 20mg     | —                 | —                     | 0.27(0.15, 0.44)  | LOW <sup>**</sup>          | 0.27(0.15, 0.44)  | LOW                   |
| Ranitidine ≤300mg VS. Esomeprazole 20mg    | —                 | —                     | 0.26(0.17, 0.39)  | VERY LOW <sup>**</sup>     | 0.26(0.17, 0.39)  | VERY LOW              |
| Ranitidine 600mg VS. Esomeprazole 20mg     | —                 | —                     | 0.31(0.20, 0.46)  | LOW <sup>**</sup>          | 0.31(0.20, 0.46)  | LOW                   |
| Ranitidine 1200mg VS. Esomeprazole 20mg    | —                 | —                     | 0.36(0.22, 0.58)  | LOW <sup>**</sup>          | 0.36(0.22, 0.58)  | LOW                   |
| Lansoprazole 15mg VS. Esomeprazole 40mg    | —                 | —                     | 0.54(0.31, 0.85)  | MODERATE <sup>¶</sup>      | 0.54(0.31, 0.85)  | MODERATE              |
| Lansoprazole 30mg VS. Esomeprazole 40mg    | 0.68 (0.58, 0.79) | MODERATE <sup>‡</sup> | 1.58(1.32, 1.90)  | VERY LOW <sup>**</sup>     | 0.81(0.60, 1.06)  | LOW <sup>‡</sup>      |
| Lansoprazole 60mg VS. Esomeprazole 40mg    | —                 | —                     | 0.93(0.66, 1.33)  | VERY LOW <sup>** ,‡</sup>  | 0.93(0.66, 1.33)  | VERY LOW              |
| Omeprazole 20mg VS. Esomeprazole 40mg      | 0.49 (0.29, 0.84) | LOW <sup>‡,※</sup>    | 0.76(0.54, 1.06)  | VERY LOW <sup>** ,‡</sup>  | 0.67(0.50, 0.88)  | LOW                   |
| Omeprazole 40mg VS. Esomeprazole 40mg      | —                 | —                     | 0.98(0.65, 1.50)  | VERY LOW <sup>** ,‡</sup>  | 0.98(0.65, 1.50)  | VERY LOW              |
| Pantoprazole 10-20mg VS. Esomeprazole 40mg | —                 | —                     | 0.46(0.26, 0.75)  | VERY LOW <sup>**</sup>     | 0.46(0.26, 0.75)  | VERY LOW              |

|                                            |                   |              |                   |              |                  |            |
|--------------------------------------------|-------------------|--------------|-------------------|--------------|------------------|------------|
| Pantoprazole 40mg VS. Esomeprazole 40mg    | 0.91 (0.62, 1.32) | VERY LOW §,※ | 0.60(0.39, 0.92)  | VERY LOW**   | 0.76(0.57, 1.01) | VERY LOW   |
| Pantoprazole 80mg VS. Esomeprazole 40mg    | —                 | —            | 0.97(0.66, 1.46)  | VERY LOW**,‡ | 0.97(0.66, 1.46) | VERY LOW   |
| Rabeprazole 5-10mg VS. Esomeprazole 40mg   | —                 | —            | 0.63(0.37, 0.92)  | LOW**        | 0.63(0.37, 0.92) | LOW        |
| Rabeprazole 20mg VS. Esomeprazole 40mg     | —                 | —            | 0.79(0.53, 1.09)  | VERY LOW**,‡ | 0.79(0.53, 1.09) | VERY LOW   |
| Rabeprazole 40-50mg VS. Esomeprazole 40mg  | 1.12 (0.80, 1.57) | LOW §        | 0.34(0.13, 0.88)  | LOW**        | 0.98(0.71, 1.34) | LOW        |
| Cimetidine 1600mg VS. Esomeprazole 40mg    | —                 | —            | 0.19(0.11, 0.30)  | LOW**        | 0.19(0.11, 0.30) | LOW        |
| Famotidine 40mg VS. Esomeprazole 40mg      | —                 | —            | 0.27(0.17, 0.43)  | LOW**        | 0.27(0.17, 0.43) | LOW        |
| Famotidine 80mg VS. Esomeprazole 40mg      | —                 | —            | 0.31(0.19, 0.51)  | LOW**        | 0.31(0.19, 0.51) | LOW        |
| Nizatidine 300mg VS. Esomeprazole 40mg     | —                 | —            | 0.16(0.10, 0.26)  | VERY LOW**   | 0.16(0.10, 0.26) | VERY LOW   |
| Nizatidine 600mg VS. Esomeprazole 40mg     | —                 | —            | 0.20(0.12, 0.32)  | VERY LOW**   | 0.20(0.12, 0.32) | VERY LOW   |
| Ranitidine ≤300mg VS. Esomeprazole 40mg    | —                 | —            | 0.19(0.13, 0.27)  | VERY LOW**   | 0.19(0.13, 0.27) | VERY LOW   |
| Ranitidine 600mg VS. Esomeprazole 40mg     | —                 | —            | 0.23(0.16, 0.33)  | MODERATE ¶   | 0.23(0.16, 0.33) | MODERATE   |
| Ranitidine 1200mg VS. Esomeprazole 40mg    | —                 | —            | 0.27(0.18, 0.41)  | VERY LOW**   | 0.27(0.18, 0.41) | VERY LOW   |
| Lansoprazole 30mg VS. Lansoprazole 15mg    | 2.06 (1.41, 3.03) | MODERATE ※   | 0.19(0.09, 0.43)  | VERY LOW**   | 1.56(1.04, 2.49) | MODERATE   |
| Lansoprazole 60mg VS. Lansoprazole 15mg    | 1.56 (0.61, 3.94) | VERY LOW §,※ | 1.89(1.06, 3.35)  | VERY LOW**,‡ | 1.79(1.13, 3.01) | LOW §§     |
| Omeprazole 20mg VS. Lansoprazole 15mg      | 2.20 (1.45, 3.34) | HIGH         | 0.01(0.003, 0.03) | VERY LOW**   | 1.29(0.83, 2.02) | MODERATE ‡ |
| Omeprazole 40mg VS. Lansoprazole 15mg      | —                 | —            | 1.91(1.07, 3.39)  | MODERATE ¶   | 1.91(1.07, 3.39) | MODERATE   |
| Pantoprazole 10-20mg VS. Lansoprazole 15mg | —                 | —            | 0.86(0.51, 1.37)  | LOW ¶,‡      | 0.86(0.51, 1.37) | LOW        |
| Pantoprazole 40mg VS. Lansoprazole 15mg    | —                 | —            | 1.48(0.93, 2.42)  | VERY LOW**,‡ | 1.48(0.93, 2.42) | VERY LOW   |
| Pantoprazole 80mg VS. Lansoprazole 15mg    | —                 | —            | 1.89(1.07, 3.44)  | LOW**        | 1.89(1.07, 3.44) | LOW        |
| Rabeprazole 5-10mg VS. Lansoprazole 15mg   | —                 | —            | 1.21(0.70, 2.01)  | VERY LOW**,‡ | 1.21(0.70, 2.01) | VERY LOW   |
| Rabeprazole 20mg VS. Lansoprazole 15mg     | —                 | —            | 1.53(0.92, 2.55)  | VERY LOW**,‡ | 1.53(0.92, 2.55) | VERY LOW   |
| Rabeprazole 40-50mg VS. Lansoprazole 15mg  | —                 | —            | 1.92(1.09, 3.43)  | LOW**        | 1.92(1.09, 3.43) | LOW        |
| Cimetidine 1600mg VS. Lansoprazole 15mg    | —                 | —            | 0.37(0.20, 0.63)  | MODERATE ¶   | 0.37(0.20, 0.63) | MODERATE   |
| Famotidine 40mg VS. Lansoprazole 15mg      | —                 | —            | 0.54(0.27, 1.01)  | LOW**        | 0.54(0.27, 1.01) | LOW        |
| Famotidine 80mg VS. Lansoprazole 15mg      | —                 | —            | 0.61(0.30, 1.16)  | LOW**        | 0.61(0.30, 1.16) | LOW        |

|                                            |                   |               |                   |                 |                   |          |
|--------------------------------------------|-------------------|---------------|-------------------|-----------------|-------------------|----------|
| Nizatidine 300mg VS. Lansoprazole 15mg     | —                 | —             | 0.31(0.18, 0.53)  | LOW**           | 0.31(0.18, 0.53)  | LOW      |
| Nizatidine 600mg VS. Lansoprazole 15mg     | —                 | —             | 0.39(0.22, 0.66)  | MODERATE¶       | 0.39(0.22, 0.66)  | MODERATE |
| Ranitidine ≤300mg VS. Lansoprazole 15mg    | —                 | —             | 0.37(0.22, 0.59)  | LOW**           | 0.37(0.22, 0.59)  | LOW      |
| Ranitidine 600mg VS. Lansoprazole 15mg     | —                 | —             | 0.44(0.26, 0.73)  | MODERATE¶       | 0.44(0.26, 0.73)  | MODERATE |
| Ranitidine 1200mg VS. Lansoprazole 15mg    | —                 | —             | 0.52(0.29, 0.93)  | MODERATE¶       | 0.52(0.29, 0.93)  | MODERATE |
| Lansoprazole 60mg VS. Lansoprazole 30mg    | 0.64 (0.21, 1.92) | VERY LOW†,§,※ | 1.17(0.96, 1.44)  | VERY LOW**,‡    | 1.15(1.003, 1.53) | LOW§§    |
| Omeprazole 20mg VS. Lansoprazole 30mg      | 0.76 (0.53, 1.09) | VERY LOW*, §  | 0.96(0.63, 1.47)  | VERY LOW**,‡    | 0.84(0.63, 1.09)  | LOW      |
| Omeprazole 40mg VS. Lansoprazole 30mg      | —                 | —             | 1.23(0.83, 1.84)  | VERY LOW**,‡    | 1.23(0.83, 1.84)  | VERY LOW |
| Pantoprazole 10-20mg VS. Lansoprazole 30mg | —                 | —             | 0.57(0.34, 0.88)  | VERY LOW**      | 0.57(0.34, 0.88)  | VERY LOW |
| Pantoprazole 40mg VS. Lansoprazole 30mg    | 0.71 (0.34, 1.48) | VERY LOW*, §  | 1.02(0.73, 1.42)  | VERY LOW**,‡    | 0.96(0.70, 1.28)  | VERY LOW |
| Pantoprazole 80mg VS. Lansoprazole 30mg    | —                 | —             | 1.21(0.82, 1.89)  | VERY LOW**,‡    | 1.21(0.82, 1.89)  | VERY LOW |
| Rabeprazole 5-10mg VS. Lansoprazole 30mg   | —                 | —             | 0.78(0.47, 1.14)  | VERY LOW**,‡    | 0.78(0.47, 1.14)  | VERY LOW |
| Rabeprazole 20mg VS. Lansoprazole 30mg     | 0.88 (0.32, 2.40) | VERY LOW*, §  | 1.01(0.68, 1.51)  | VERY LOW**,‡    | 0.99(0.66, 1.39)  | VERY LOW |
| Rabeprazole 40-50mg VS. Lansoprazole 30mg  | —                 | —             | 1.24(0.84, 1.82)  | VERY LOW**,‡,‡‡ | 1.24(0.84, 1.82)  | VERY LOW |
| Cimetidine 1600mg VS. Lansoprazole 30mg    | —                 | —             | 0.24(0.14, 0.37)  | LOW**           | 0.24(0.14, 0.37)  | LOW      |
| Famotidine 40mg VS. Lansoprazole 30mg      | —                 | —             | 0.34(0.21, 0.54)  | LOW**           | 0.34(0.21, 0.54)  | LOW      |
| Famotidine 80mg VS. Lansoprazole 30mg      | —                 | —             | 0.39(0.23, 0.64)  | LOW**           | 0.39(0.23, 0.64)  | LOW      |
| Nizatidine 300mg VS. Lansoprazole 30mg     | —                 | —             | 0.20(0.12, 0.31)  | LOW**           | 0.20(0.12, 0.31)  | LOW      |
| Nizatidine 600mg VS. Lansoprazole 30mg     | —                 | —             | 0.25(0.15, 0.39)  | LOW**           | 0.25(0.15, 0.39)  | LOW      |
| Ranitidine ≤300mg VS. Lansoprazole 30mg    | 0.16 (0.06, 0.40) | LOW†,※        | 0.25(0.18, 0.35)  | VERY LOW**      | 0.24(0.17, 0.32)  | LOW      |
| Ranitidine 600mg VS. Lansoprazole 30mg     | 0.19 (0.07, 0.51) | MODERATE※     | 0.31(0.21, 0.45)  | LOW**           | 0.29(0.20, 0.40)  | MODERATE |
| Ranitidine 1200mg VS. Lansoprazole 30mg    | —                 | —             | 0.34(0.23, 0.51)  | LOW**           | 0.34(0.23, 0.51)  | LOW      |
| Omeprazole 20mg VS. Lansoprazole 60mg      | —                 | —             | 0.74(0.49, 1.001) | VERY LOW**      | 0.74(0.49, 1.001) | VERY LOW |
| Omeprazole 40mg VS. Lansoprazole 60mg      | —                 | —             | 1.08(0.68, 1.65)  | LOW¶,‡          | 1.08(0.68, 1.65)  | LOW      |
| Pantoprazole 10-20mg VS. Lansoprazole 60mg | —                 | —             | 0.50(0.28, 0.80)  | LOW¶,‡‡         | 0.50(0.28, 0.80)  | LOW      |
| Pantoprazole 40mg VS. Lansoprazole 60mg    | —                 | —             | 0.84(0.57, 1.17)  | VERY LOW**,‡    | 0.84(0.57, 1.17)  | VERY LOW |

|                                           |                   |                              |                  |                                         |                  |             |
|-------------------------------------------|-------------------|------------------------------|------------------|-----------------------------------------|------------------|-------------|
| Pantoprazole 80mg VS. Lansoprazole 60mg   | —                 | —                            | 1.07(0.68, 1.69) | VERY LOW**, <sup>‡</sup>                | 1.07(0.68, 1.69) | VERY LOW    |
| Rabeprazole 5-10mg VS. Lansoprazole 60mg  | —                 | —                            | 0.69(0.39, 1.02) | VERY LOW**, <sup>‡</sup>                | 0.69(0.39, 1.02) | VERY LOW    |
| Rabeprazole 20mg VS. Lansoprazole 60mg    | —                 | —                            | 0.87(0.55, 1.25) | VERY LOW**, <sup>‡</sup>                | 0.87(0.55, 1.25) | VERY LOW    |
| Rabeprazole 40-50mg VS. Lansoprazole 60mg | —                 | —                            | 1.09(0.69, 1.62) | VERY LOW**, <sup>‡</sup>                | 1.09(0.69, 1.62) | VERY LOW    |
| Cimetidine 1600mg VS. Lansoprazole 60mg   | —                 | —                            | 0.21(0.12, 0.34) | VERY LOW**                              | 0.21(0.12, 0.34) | VERY LOW    |
| Famotidine 40mg VS. Lansoprazole 60mg     | —                 | —                            | 0.30(0.18, 0.49) | LOW**                                   | 0.30(0.18, 0.49) | LOW         |
| Famotidine 80mg VS. Lansoprazole 60mg     | —                 | —                            | 0.34(0.20, 0.56) | LOW**                                   | 0.34(0.20, 0.56) | LOW         |
| Nizatidine 300mg VS. Lansoprazole 60mg    | —                 | —                            | 0.18(0.10, 0.28) | LOW**                                   | 0.18(0.10, 0.28) | LOW         |
| Nizatidine 600mg VS. Lansoprazole 60mg    | —                 | —                            | 0.22(0.13, 0.35) | MODERATE¶                               | 0.22(0.13, 0.35) | MODERATE    |
| Ranitidine ≤300mg VS. Lansoprazole 60mg   | 0.25 (0.12, 0.51) | MODERATE※                    | 0.20(0.13, 0.31) | VERY LOW**                              | 0.21(0.14, 0.30) | MODERATE    |
| Ranitidine 600mg VS. Lansoprazole 60mg    | —                 | —                            | 0.25(0.17, 0.36) | MODERATE¶                               | 0.25(0.17, 0.36) | MODERATE    |
| Ranitidine 1200mg VS. Lansoprazole 60mg   | —                 | —                            | 0.30(0.19, 0.46) | MODERATE¶                               | 0.30(0.19, 0.46) | MODERATE    |
| Omeprazole 40mg VS. Omeprazole 20mg       | —                 | —                            | 1.49(1.03, 2.31) | VERY LOW**                              | 1.49(1.03, 2.31) | VERY LOW    |
| Pantoprazole 10-20mg VS. Omeprazole 20mg  | 0.56 (0.30, 1.04) | VERY LOW*, §                 | 0.83(0.44, 1.57) | VERY LOW**, <sup>‡</sup>                | 0.68(0.42, 1.02) | LOW§§       |
| Pantoprazole 40mg VS. Omeprazole 20mg     | 1.14 (0.56, 2.35) | VERY LOW*, <sup>‡</sup> ,§   | 1.16(0.84, 1.62) | VERY LOW**, <sup>‡</sup>                | 1.16(0.85, 1.55) | VERY LOW    |
| Pantoprazole 80mg VS. Omeprazole 20mg     | —                 | —                            | 1.47(0.99, 2.29) | VERY LOW**, <sup>‡</sup>                | 1.47(0.99, 2.29) | VERY LOW    |
| Rabeprazole 5-10mg VS. Omeprazole 20mg    | 0.65 (0.22, 1.89) | LOW §                        | 1.02(0.64, 1.64) | VERY LOW**, <sup>‡</sup>                | 0.95(0.58, 1.38) | LOW         |
| Rabeprazole 20mg VS. Omeprazole 20mg      | 1.36 (0.35, 5.28) | VERY LOW*, <sup>‡</sup> ,§,※ | 1.19(0.81, 1.74) | VERY LOW**, <sup>‡</sup>                | 1.20(0.82, 1.70) | VERY LOW    |
| Rabeprazole 40-50mg VS. Omeprazole 20mg   | 0.65 (0.22, 1.91) | LOW §                        | 1.69(1.12, 2.53) | VERY LOW**, <sup>‡</sup> , <sup>‡</sup> | 1.50(1.02, 2.18) | MODERATE §§ |
| Cimetidine 1600mg VS. Omeprazole 20mg     | —                 | —                            | 0.29(0.17, 0.45) | MODERATE¶                               | 0.29(0.17, 0.45) | MODERATE    |
| Famotidine 40mg VS. Omeprazole 20mg       | 0.29(0.16, 0.51)  | MODERATE※                    | 1.11(0.43, 2.82) | LOW**                                   | 0.42(0.25, 0.67) | MODERATE    |
| Famotidine 80mg VS. Omeprazole 20mg       | —                 | —                            | 0.47(0.27, 0.80) | VERY LOW**                              | 0.47(0.27, 0.80) | VERY LOW    |
| Nizatidine 300mg VS. Omeprazole 20mg      | —                 | —                            | 0.25(0.15, 0.37) | VERY LOW**                              | 0.25(0.15, 0.37) | VERY LOW    |
| Nizatidine 600mg VS. Omeprazole 20mg      | —                 | —                            | 0.30(0.19, 0.47) | MODERATE¶                               | 0.30(0.19, 0.47) | MODERATE    |
| Ranitidine ≤300mg VS. Omeprazole 20mg     | —                 | —                            | 0.29(0.20, 0.40) | VERY LOW**                              | 0.29(0.20, 0.40) | VERY LOW    |
| Ranitidine 600mg VS. Omeprazole 20mg      | —                 | —                            | 0.35(0.24, 0.49) | VERY LOW**                              | 0.35(0.24, 0.49) | VERY LOW    |

|                                              |                   |           |                  |                   |                  |          |
|----------------------------------------------|-------------------|-----------|------------------|-------------------|------------------|----------|
| Ranitidine 1200mg VS. Omeprazole 20mg        | —                 | —         | 0.41(0.27, 0.63) | MODERATE ¶        | 0.41(0.27, 0.63) | MODERATE |
| Pantoprazole 10-20mg VS. Omeprazole 40mg     | —                 | —         | 0.48(0.25, 0.81) | MODERATE ¶        | 0.48(0.25, 0.81) | MODERATE |
| Pantoprazole 40mg VS. Omeprazole 40mg        | 0.96 (0.70, 1.32) | LOW §     | 0.72(0.42, 1.25) | LOW ¶, †          | 0.80(0.52, 1.13) | LOW      |
| Pantoprazole 80mg VS. Omeprazole 40mg        | —                 | —         | 1.02(0.62, 1.59) | VERY LOW**, †     | 1.02(0.62, 1.59) | VERY LOW |
| Rabeprazole 5-10mg VS. Omeprazole 40mg       | —                 | —         | 0.66(0.35, 1.03) | VERY LOW**, †     | 0.66(0.35, 1.03) | VERY LOW |
| Rabeprazole 20mg VS. Omeprazole 40mg         | —                 | —         | 0.83(0.49, 1.24) | VERY LOW**, †     | 0.83(0.49, 1.24) | VERY LOW |
| Rabeprazole 40-50mg VS. Omeprazole 40mg      | —                 | —         | 1.04(0.64, 1.57) | VERY LOW**, †     | 1.04(0.64, 1.57) | VERY LOW |
| Cimetidine 1600mg VS. Omeprazole 40mg        | 0.12 (0.04, 0.38) | HIGH      | 0.23(0.13, 0.43) | MODERATE ¶        | 0.20(0.11, 0.32) | HIGH     |
| Famotidine 40mg VS. Omeprazole 40mg          | —                 | —         | 0.29(0.16, 0.47) | LOW**             | 0.29(0.16, 0.47) | LOW      |
| Famotidine 80mg VS. Omeprazole 40mg          | —                 | —         | 0.33(0.19, 0.55) | LOW**             | 0.33(0.19, 0.55) | LOW      |
| Nizatidine 300mg VS. Omeprazole 40mg         | —                 | —         | 0.17(0.09, 0.28) | LOW**             | 0.17(0.09, 0.28) | LOW      |
| Nizatidine 600mg VS. Omeprazole 40mg         | —                 | —         | 0.21(0.12, 0.35) | MODERATE ¶        | 0.21(0.12, 0.35) | MODERATE |
| Ranitidine ≤300mg VS. Omeprazole 40mg        | 0.20 (0.11, 0.38) | HIGH      | 0.20(0.12, 0.34) | LOW**             | 0.20(0.13, 0.29) | HIGH     |
| Ranitidine 600mg VS. Omeprazole 40mg         | 0.10 (0.04, 0.27) | HIGH      | 0.30(0.19, 0.48) | LOW**             | 0.24(0.15, 0.35) | HIGH     |
| Ranitidine 1200mg VS. Omeprazole 40mg        | —                 | —         | 0.28(0.17, 0.43) | LOW**             | 0.28(0.17, 0.43) | LOW      |
| Pantoprazole 40mg VS. Pantoprazole 10-20mg   | 3.24 (1.99, 5.28) | HIGH      | 0.03(0.01, 0.11) | LOW †             | 1.77(1.09, 2.71) | HIGH     |
| Pantoprazole 80mg VS. Pantoprazole 10-20mg   | —                 | —         | 2.25(1.25, 3.96) | LOW**             | 2.25(1.25, 3.96) | LOW      |
| Rabeprazole 5-10mg VS. Pantoprazole 10-20mg  | —                 | —         | 1.44(0.83, 2.34) | VERY LOW**, †, †† | 1.44(0.83, 2.34) | VERY LOW |
| Rabeprazole 20mg VS. Pantoprazole 10-20mg    | —                 | —         | 1.83(1.07, 3.02) | VERY LOW**, †, †† | 1.83(1.07, 3.02) | VERY LOW |
| Rabeprazole 40-50mg VS. Pantoprazole 10-20mg | —                 | —         | 2.30(1.23, 3.99) | VERY LOW**, †, †† | 2.30(1.23, 3.99) | VERY LOW |
| Cimetidine 1600mg VS. Pantoprazole 10-20mg   | —                 | —         | 0.44(0.24, 0.72) | VERY LOW**, †, †† | 0.44(0.24, 0.72) | VERY LOW |
| Famotidine 40mg VS. Pantoprazole 10-20mg     | —                 | —         | 0.64(0.31, 1.17) | VERY LOW**        | 0.64(0.31, 1.17) | VERY LOW |
| Famotidine 80mg VS. Pantoprazole 10-20mg     | —                 | —         | 0.73(0.34, 1.35) | VERY LOW**, †, †† | 0.73(0.34, 1.35) | VERY LOW |
| Nizatidine 300mg VS. Pantoprazole 10-20mg    | —                 | —         | 0.37(0.22, 0.60) | MODERATE ¶        | 0.37(0.22, 0.60) | MODERATE |
| Nizatidine 600mg VS. Pantoprazole 10-20mg    | —                 | —         | 0.46(0.26, 0.76) | MODERATE ¶        | 0.46(0.26, 0.76) | MODERATE |
| Ranitidine ≤300mg VS. Pantoprazole 10-20mg   | 0.49 (0.32, 0.77) | MODERATE※ | 0.42(0.08, 2.47) | MODERATE ¶        | 0.44(0.27, 0.67) | MODERATE |



|                                            |                   |              |                  |                                       |                  |             |
|--------------------------------------------|-------------------|--------------|------------------|---------------------------------------|------------------|-------------|
| Ranitidine 600mg VS. Pantoprazole 10-20mg  | —                 | —            | 0.53(0.31, 0.84) | VERY LOW**, <sup>‡</sup> <sub>‡</sub> | 0.53(0.31, 0.84) | VERY LOW    |
| Ranitidine 1200mg VS. Pantoprazole 10-20mg | —                 | —            | 0.62(0.34, 1.07) | HIGH[]                                | 0.62(0.34, 1.07) | HIGH        |
| Pantoprazole 80mg VS. Pantoprazole 40mg    | 1.21 (0.68, 2.16) | LOW §        | 1.30(0.89, 1.88) | LOW¶, <sup>‡</sup>                    | 1.27(1.01, 1.89) | MODERATE §§ |
| Rabeprazole 5-10mg VS. Pantoprazole 40mg   | —                 | —            | 0.83(0.50, 1.21) | VERY LOW**, <sup>‡</sup>              | 0.83(0.50, 1.21) | VERY LOW    |
| Rabeprazole 20mg VS. Pantoprazole 40mg     | 1.39 (0.55, 3.51) | VERY LOW*, § | 0.99(0.66, 1.47) | VERY LOW**, <sup>‡</sup>              | 1.04(0.71, 1.48) | VERY LOW    |
| Rabeprazole 40-50mg VS. Pantoprazole 40mg  | —                 | —            | 1.30(0.89, 1.90) | VERY LOW**, <sup>‡</sup> <sub>‡</sub> | 1.30(0.89, 1.90) | VERY LOW    |
| Cimetidine 1600mg VS. Pantoprazole 40mg    | —                 | —            | 0.25(0.15, 0.39) | VERY LOW**                            | 0.25(0.15, 0.39) | VERY LOW    |
| Famotidine 40mg VS. Pantoprazole 40mg      | —                 | —            | 0.36(0.22, 0.57) | LOW**                                 | 0.36(0.22, 0.57) | LOW         |
| Famotidine 80mg VS. Pantoprazole 40mg      | —                 | —            | 0.41(0.25, 0.66) | LOW**                                 | 0.41(0.25, 0.66) | LOW         |
| Nizatidine 300mg VS. Pantoprazole 40mg     | 0.26 (0.14, 0.47) | MODERATE†    | 0.19(0.11, 0.33) | LOW**                                 | 0.22(0.14, 0.32) | MODERATE    |
| Nizatidine 600mg VS. Pantoprazole 40mg     | —                 | —            | 0.26(0.16, 0.41) | VERY LOW**                            | 0.26(0.16, 0.41) | VERY LOW    |
| Ranitidine ≤300mg VS. Pantoprazole 40mg    | 0.32 (0.16, 0.62) | MODERATE†    | 0.24(0.17, 0.33) | LOW¶, <sup>‡</sup> <sub>‡</sub>       | 0.25(0.19, 0.34) | MODERATE    |
| Ranitidine 600mg VS. Pantoprazole 40mg     | —                 | —            | 0.30(0.21, 0.42) | MODERATE¶                             | 0.30(0.21, 0.42) | MODERATE    |
| Ranitidine 1200mg VS. Pantoprazole 40mg    | —                 | —            | 0.35(0.24, 0.53) | HIGH[]                                | 0.35(0.24, 0.53) | HIGH        |
| Rabeprazole 5-10mg VS. Pantoprazole 80mg   | —                 | —            | 0.67(0.35, 1.05) | VERY LOW**, <sup>‡</sup>              | 0.67(0.35, 1.05) | VERY LOW    |
| Rabeprazole 20mg VS. Pantoprazole 80mg     | —                 | —            | 0.84(0.50, 1.26) | VERY LOW**, <sup>‡</sup>              | 0.84(0.50, 1.26) | VERY LOW    |
| Rabeprazole 40-50mg VS. Pantoprazole 80mg  | —                 | —            | 1.05(0.63, 1.61) | VERY LOW**, <sup>‡</sup>              | 1.05(0.63, 1.61) | VERY LOW    |
| Cimetidine 1600mg VS. Pantoprazole 80mg    | —                 | —            | 0.20(0.11, 0.33) | LOW**                                 | 0.20(0.11, 0.33) | LOW         |
| Famotidine 40mg VS. Pantoprazole 80mg      | —                 | —            | 0.29(0.17, 0.47) | LOW**                                 | 0.29(0.17, 0.47) | LOW         |
| Famotidine 80mg VS. Pantoprazole 80mg      | —                 | —            | 0.33(0.18, 0.56) | LOW**                                 | 0.33(0.18, 0.56) | LOW         |
| Nizatidine 300mg VS. Pantoprazole 80mg     | 0.15 (0.07, 0.32) | HIGH         | 0.19(0.09, 0.38) | LOW**                                 | 0.17(0.10, 0.28) | HIGH        |
| Nizatidine 600mg VS. Pantoprazole 80mg     | —                 | —            | 0.21(0.12, 0.35) | VERY LOW**                            | 0.21(0.12, 0.35) | VERY LOW    |
| Ranitidine ≤300mg VS. Pantoprazole 80mg    | —                 | —            | 0.20(0.12, 0.29) | LOW**                                 | 0.20(0.12, 0.29) | LOW         |
| Ranitidine 600mg VS. Pantoprazole 80mg     | —                 | —            | 0.24(0.15, 0.36) | LOW**                                 | 0.24(0.15, 0.36) | LOW         |
| Ranitidine 1200mg VS. Pantoprazole 80mg    | —                 | —            | 0.29(0.17, 0.45) | LOW**                                 | 0.29(0.17, 0.45) | LOW         |
| Rabeprazole 20mg VS. Rabeprazole 5-10mg    | —                 | —            | 1.29(1.01, 2.01) | VERY LOW**                            | 1.29(1.01, 2.01) | VERY LOW    |

|                                            |                   |           |                  |            |                  |          |
|--------------------------------------------|-------------------|-----------|------------------|------------|------------------|----------|
| Rabeprazole 40-50mg VS. Rabeprazole 5-10mg | 1.01 (0.38, 2.66) | LOW §     | 1.87(1.11, 3.15) | LOW**      | 1.63(1.09, 2.73) | LOW      |
| Cimetidine 1600mg VS. Rabeprazole 5-10mg   | —                 | —         | 0.32(0.17, 0.54) | LOW**      | 0.32(0.17, 0.54) | LOW      |
| Famotidine 40mg VS. Rabeprazole 5-10mg     | —                 | —         | 0.46(0.24, 0.86) | LOW**      | 0.46(0.24, 0.86) | LOW      |
| Famotidine 80mg VS. Rabeprazole 5-10mg     | —                 | —         | 0.52(0.27, 0.98) | VERY LOW** | 0.52(0.27, 0.98) | VERY LOW |
| Nizatidine 300mg VS. Rabeprazole 5-10mg    | —                 | —         | 0.27(0.16, 0.45) | LOW**      | 0.27(0.16, 0.45) | LOW      |
| Nizatidine 600mg VS. Rabeprazole 5-10mg    | —                 | —         | 0.33(0.19, 0.58) | LOW**      | 0.33(0.19, 0.58) | LOW      |
| Ranitidine ≤300mg VS. Rabeprazole 5-10mg   | —                 | —         | 0.32(0.20, 0.50) | VERY LOW** | 0.32(0.20, 0.50) | VERY LOW |
| Ranitidine 600mg VS. Rabeprazole 5-10mg    | —                 | —         | 0.38(0.24, 0.63) | VERY LOW** | 0.38(0.24, 0.63) | VERY LOW |
| Ranitidine 1200mg VS. Rabeprazole 5-10mg   | —                 | —         | 0.45(0.26, 0.78) | LOW**      | 0.45(0.26, 0.78) | LOW      |
| Rabeprazole 40-50mg VS. Rabeprazole 20mg   | —                 | —         | 1.27(1.01, 1.89) | VERY LOW** | 1.27(1.01, 1.89) | VERY LOW |
| Cimetidine 1600mg VS. Rabeprazole 20mg     | —                 | —         | 0.25(0.14, 0.40) | MODERATE ¶ | 0.25(0.14, 0.40) | MODERATE |
| Famotidine 40mg VS. Rabeprazole 20mg       | —                 | —         | 0.36(0.21, 0.61) | LOW**      | 0.36(0.21, 0.61) | LOW      |
| Famotidine 80mg VS. Rabeprazole 20mg       | —                 | —         | 0.40(0.23, 0.69) | LOW**      | 0.40(0.23, 0.69) | LOW      |
| Nizatidine 300mg VS. Rabeprazole 20mg      | —                 | —         | 0.21(0.12, 0.34) | VERY LOW** | 0.21(0.12, 0.34) | VERY LOW |
| Nizatidine 600mg VS. Rabeprazole 20mg      | —                 | —         | 0.26(0.15, 0.43) | VERY LOW** | 0.26(0.15, 0.43) | VERY LOW |
| Ranitidine ≤300mg VS. Rabeprazole 20mg     | —                 | —         | 0.25(0.16, 0.36) | LOW**      | 0.25(0.16, 0.36) | LOW      |
| Ranitidine 600mg VS. Rabeprazole 20mg      | 0.28 (0.16, 0.49) | MODERATE* | 0.33(0.17, 0.62) | VERY LOW** | 0.3(0.19, 0.44)  | MODERATE |
| Ranitidine 1200mg VS. Rabeprazole 20mg     | —                 | —         | 0.35(0.22, 0.56) | LOW**      | 0.35(0.22, 0.56) | LOW      |
| Cimetidine 1600mg VS. Rabeprazole 40-50mg  | —                 | —         | 0.20(0.10, 0.33) | LOW**      | 0.20(0.10, 0.33) | LOW      |
| Famotidine 40mg VS. Rabeprazole 40-50mg    | —                 | —         | 0.29(0.17, 0.47) | LOW**      | 0.29(0.17, 0.47) | LOW      |
| Famotidine 80mg VS. Rabeprazole 40-50mg    | —                 | —         | 0.32(0.19, 0.54) | LOW**      | 0.32(0.19, 0.54) | LOW      |
| Nizatidine 300mg VS. Rabeprazole 40-50mg   | —                 | —         | 0.17(0.09, 0.28) | LOW**      | 0.17(0.09, 0.28) | LOW      |
| Nizatidine 600mg VS. Rabeprazole 40-50mg   | —                 | —         | 0.21(0.11, 0.34) | LOW**      | 0.21(0.11, 0.34) | LOW      |
| Ranitidine ≤300mg VS. Rabeprazole 40-50mg  | —                 | —         | 0.20(0.12, 0.30) | LOW**      | 0.20(0.12, 0.30) | LOW      |
| Ranitidine 600mg VS. Rabeprazole 40-50mg   | —                 | —         | 0.24(0.15, 0.36) | LOW**      | 0.24(0.15, 0.36) | LOW      |
| Ranitidine 1200mg VS. Rabeprazole 40-50mg  | —                 | —         | 0.28(0.17, 0.45) | LOW**      | 0.28(0.17, 0.45) | LOW      |

|                                         |                   |                              |                  |                                      |                   |                  |
|-----------------------------------------|-------------------|------------------------------|------------------|--------------------------------------|-------------------|------------------|
| Famotidine 40mg VS. Cimetidine 1600mg   | —                 | —                            | 1.50(0.86, 2.62) | VERY LOW**, <sup>‡</sup>             | 1.50(0.86, 2.62)  | VERY LOW         |
| Famotidine 80mg VS. Cimetidine 1600mg   | —                 | —                            | 1.70(0.96, 2.99) | VERY LOW**, <sup>‡</sup>             | 1.70(0.96, 2.99)  | VERY LOW         |
| Nizatidine 300mg VS. Cimetidine 1600mg  | —                 | —                            | 0.89(0.52, 1.40) | VERY LOW**, <sup>‡</sup>             | 0.89(0.52, 1.40)  | VERY LOW         |
| Nizatidine 600mg VS. Cimetidine 1600mg  | —                 | —                            | 1.09(0.63, 1.79) | LOW <sup>¶</sup> , <sup>‡</sup>      | 1.09(0.63, 1.79)  | LOW              |
| Ranitidine ≤300mg VS. Cimetidine 1600mg | 1.17 (0.82, 1.69) | VERY LOW*, §                 | 0.62(0.31, 1.28) | MODERATE <sup>¶</sup> , <sup>‡</sup> | 1.05(0.67, 1.55)  | MODERATE         |
| Ranitidine 600mg VS. Cimetidine 1600mg  | 1.86 (1.28, 2.72) | MODERATE*                    | 0.08(0.03, 0.20) | MODERATE <sup>¶</sup>                | 1.24(0.81, 1.86)  | LOW <sup>‡</sup> |
| Ranitidine 1200mg VS. Cimetidine 1600mg | —                 | —                            | 1.46(0.92, 2.34) | LOW <sup>¶</sup> , <sup>‡</sup>      | 1.46(0.92, 2.34)  | LOW              |
| Famotidine 80mg VS. Famotidine 40mg     | 0.81 (0.49, 1.34) | LOW §                        | 1.22(0.98, 1.51) | VERY LOW**, <sup>‡</sup>             | 1.14(1.004, 1.51) | MODERATE §§      |
| Nizatidine 300mg VS. Famotidine 40mg    | —                 | —                            | 0.62(0.33, 1.01) | VERY LOW**, <sup>‡</sup>             | 0.62(0.33, 1.01)  | VERY LOW         |
| Nizatidine 600mg VS. Famotidine 40mg    | —                 | —                            | 0.76(0.40, 1.23) | VERY LOW**, <sup>‡</sup>             | 0.76(0.40, 1.23)  | VERY LOW         |
| Ranitidine ≤300mg VS. Famotidine 40mg   | 0.74 (0.45, 1.23) | LOW §                        | 0.70(0.31, 1.60) | VERY LOW**, <sup>‡</sup>             | 0.73(0.45, 1.06)  | LOW              |
| Ranitidine 600mg VS. Famotidine 40mg    | —                 | —                            | 0.86(0.54, 1.26) | VERY LOW**, <sup>‡</sup>             | 0.86(0.54, 1.26)  | VERY LOW         |
| Ranitidine 1200mg VS. Famotidine 40mg   | —                 | —                            | 1.01(0.62, 1.55) | VERY LOW**, <sup>‡</sup>             | 1.01(0.62, 1.55)  | VERY LOW         |
| Nizatidine 300mg VS. Famotidine 80mg    | —                 | —                            | 0.55(0.28, 0.89) | LOW**                                | 0.55(0.28, 0.89)  | LOW              |
| Nizatidine 600mg VS. Famotidine 80mg    | —                 | —                            | 0.67(0.35, 1.11) | VERY LOW**, <sup>‡</sup>             | 0.67(0.35, 1.11)  | VERY LOW         |
| Ranitidine ≤300mg VS. Famotidine 80mg   | 0.92 (0.60, 1.40) | LOW §                        | 0.03(0.01, 0.13) | LOW**                                | 0.64(0.39, 0.95)  | LOW              |
| Ranitidine 600mg VS. Famotidine 80mg    | —                 | —                            | 0.76(0.46, 1.11) | VERY LOW**, <sup>‡</sup>             | 0.76(0.46, 1.11)  | VERY LOW         |
| Ranitidine 1200mg VS. Famotidine 80mg   | —                 | —                            | 0.90(0.54, 1.36) | VERY LOW**, <sup>‡</sup>             | 0.90(0.54, 1.36)  | VERY LOW         |
| Nizatidine 600mg VS. Nizatidine 300mg   | 1.15 (0.67, 1.97) | VERY LOW <sup>†</sup> , §, ※ | 1.28(0.92, 1.77) | VERY LOW**, <sup>‡</sup>             | 1.24(1.01, 1.77)  | LOW §§           |
| Ranitidine ≤300mg VS. Nizatidine 300mg  | —                 | —                            | 1.21(0.81, 1.81) | LOW <sup>¶</sup> , <sup>‡</sup>      | 1.21(0.81, 1.81)  | LOW              |
| Ranitidine 600mg VS. Nizatidine 300mg   | —                 | —                            | 1.44(0.96, 2.16) | VERY LOW**, <sup>‡</sup>             | 1.44(0.96, 2.16)  | VERY LOW         |
| Ranitidine 1200mg VS. Nizatidine 300mg  | —                 | —                            | 1.70(1.08, 2.67) | VERY LOW**, <sup>‡</sup>             | 1.70(1.08, 2.67)  | VERY LOW         |
| Ranitidine ≤300mg VS. Nizatidine 600mg  | —                 | —                            | 0.99(0.64, 1.47) | VERY LOW**, <sup>‡</sup>             | 0.99(0.64, 1.47)  | VERY LOW         |
| Ranitidine 600mg VS. Nizatidine 600mg   | —                 | —                            | 1.18(0.75, 1.77) | LOW <sup>¶</sup> , <sup>‡</sup>      | 1.18(0.75, 1.77)  | LOW              |
| Ranitidine 1200mg VS. Nizatidine 600mg  | —                 | —                            | 1.39(0.86, 2.21) | LOW <sup>¶</sup> , <sup>‡</sup>      | 1.39(0.86, 2.21)  | LOW              |
| Ranitidine 600mg VS. Ranitidine ≤300mg  | 1.59 (1.09, 2.31) | LOW*, <sup>‡</sup>           | 1.01(0.76, 1.36) | VERY LOW**                           | 1.20(1.01, 1.60)  | LOW              |

|                                         |                   |       |                  |            |                  |             |
|-----------------------------------------|-------------------|-------|------------------|------------|------------------|-------------|
| Ranitidine 1200mg VS. Ranitidine ≤300mg | —                 | —     | 1.41(1.06, 2.07) | VERY LOW** | 1.41(1.06, 2.07) | VERY LOW    |
| Ranitidine 1200mg VS. Ranitidine 600mg  | 0.84 (0.57, 1.24) | LOW § | 1.44(1.07, 1.94) | LOW¶,‡     | 1.18(1.01, 1.62) | MODERATE §§ |

—Not applicable. \*Limitations (risk of bias). †Inconsistency. ‡Imprecision. §Severe imprecision. ※Publication bias. \*\*Contributing direct evidence of low or very low quality. ¶Contributing direct evidence of moderate quality. ¶¶Contributing direct evidence of high quality. ‡‡Indirectness because of questionable comparability of trial populations to target population of NMA (level of disease from endoscopy) or because of intransitivity. §§Greater precision.

## **Supplementary Figure Legends**

**Supplementary Figure S1a.** Risk of bias summary (continued)

**Supplementary Figure S1b.** Risk of bias summary (continued)

**Supplementary Figure S1c.** Risk of bias summary (continued)

**Supplementary Figure S1d.** Risk of bias summary

Supplementary Figure S1a. Risk of bias summary (continued)

|                  | Random sequence generation (selection bias) | Allocation concealment (selection bias) | Blinding of participants and personnel (performance bias) | Blinding of outcome assessment (detection bias) | Incomplete outcome data (attrition bias) | Selective reporting (reporting bias) | Other bias |
|------------------|---------------------------------------------|-----------------------------------------|-----------------------------------------------------------|-------------------------------------------------|------------------------------------------|--------------------------------------|------------|
| Adachi 2003      | ?                                           | +                                       | ?                                                         | ?                                               | ?                                        | +                                    | ?          |
| Armstrong 2001   | +                                           | ?                                       | +                                                         | ?                                               | +                                        | +                                    | +          |
| Armstrong a 2004 | ?                                           | ?                                       | ?                                                         | ?                                               | +                                        | +                                    | +          |
| Armstrong b 2004 | ?                                           | ?                                       | ?                                                         | ?                                               | +                                        | +                                    | +          |
| Armstrong c 2004 | ?                                           | ?                                       | ?                                                         | ?                                               | +                                        | +                                    | +          |
| Bardhan 1995     | +                                           | +                                       | +                                                         | +                                               | +                                        | +                                    | +          |
| Bardhan 2001     | +                                           | ?                                       | ●                                                         | ●                                               | +                                        | +                                    | +          |
| Bardhan 2007     | +                                           | +                                       | +                                                         | ?                                               | +                                        | +                                    | +          |
| Bate 1996        | ?                                           | ?                                       | +                                                         | ?                                               | +                                        | +                                    | ?          |
| Bate 1997        | ?                                           | ?                                       | ?                                                         | ?                                               | +                                        | +                                    | ?          |
| Bytzer 2006      | +                                           | +                                       | +                                                         | ?                                               | +                                        | +                                    | ?          |
| Castell 1996     | ?                                           | ?                                       | +                                                         | ?                                               | +                                        | +                                    | ?          |
| Castell 2002     | +                                           | +                                       | +                                                         | ?                                               | +                                        | +                                    | +          |
| Cho 2012         | +                                           | ?                                       | +                                                         | ?                                               | +                                        | +                                    | ?          |
| Cloud 1992       | +                                           | ?                                       | +                                                         | ?                                               | +                                        | +                                    | +          |
| Dehn 1990        | ?                                           | ?                                       | +                                                         | ?                                               | ?                                        | +                                    | ?          |
| Delchier 2000    | ?                                           | ?                                       | +                                                         | ?                                               | +                                        | +                                    | ?          |
| Dettmer 1998     | ?                                           | ?                                       | +                                                         | ?                                               | +                                        | +                                    | +          |
| Earnest 1998     | ?                                           | ?                                       | +                                                         | ?                                               | +                                        | +                                    | ?          |
| Eggleston 2009   | ?                                           | ?                                       | +                                                         | +                                               | +                                        | +                                    | +          |
| Euler 1993       | ?                                           | ?                                       | +                                                         | ?                                               | ?                                        | +                                    | ?          |
| Farley 2000      | ?                                           | ?                                       | +                                                         | +                                               | +                                        | +                                    | +          |
| Fass 2000        | +                                           | ?                                       | ●                                                         | ●                                               | +                                        | +                                    | ?          |
| Fennerty 2005    | +                                           | +                                       | +                                                         | +                                               | +                                        | +                                    | ?          |
| Festen 1999      | +                                           | ?                                       | +                                                         | ?                                               | +                                        | +                                    | +          |

Supplementary Figure S1b. Risk of bias summary (continued)

|                | Random sequence generation (selection bias) | Allocation concealment (selection bias) | Blinding of participants and personnel (performance bias) | Blinding of outcome assessment (detection bias) | Incomplete outcome data (attrition bias) | Selective reporting (reporting bias) | Other bias |
|----------------|---------------------------------------------|-----------------------------------------|-----------------------------------------------------------|-------------------------------------------------|------------------------------------------|--------------------------------------|------------|
| Fock 2005      | +                                           | ?                                       | +                                                         | +                                               | +                                        | +                                    | ?          |
| Galmiche 1997  | ?                                           | ?                                       | +                                                         | ?                                               | +                                        | +                                    | ?          |
| Galmiche 1998  | ?                                           | ?                                       | +                                                         | ?                                               | +                                        | +                                    | +          |
| Gillessen 2004 | +                                           | ?                                       | +                                                         | ?                                               | +                                        | +                                    | +          |
| Glatzel 2007   | ?                                           | ?                                       | +                                                         | +                                               | +                                        | +                                    | +          |
| Havelund 1988  | +                                           | +                                       | +                                                         | ?                                               | +                                        | +                                    | +          |
| Holtmann 2002  | +                                           | ?                                       | +                                                         | +                                               | +                                        | +                                    | +          |
| Hongo 2008     | +                                           | +                                       | +                                                         | ?                                               | +                                        | +                                    | +          |
| Jansen 1999    | ?                                           | +                                       | +                                                         | ?                                               | +                                        | +                                    | +          |
| Johnson 2005   | +                                           | +                                       | +                                                         | +                                               | +                                        | +                                    | +          |
| Johnson 2010   | +                                           | +                                       | +                                                         | +                                               | +                                        | +                                    | +          |
| Jones 1999     | +                                           | ?                                       | +                                                         | ?                                               | +                                        | +                                    | ?          |
| Kahrilas 2000  | ?                                           | +                                       | +                                                         | +                                               | +                                        | +                                    | +          |
| Kahrilas 2005  | ?                                           | ?                                       | +                                                         | ?                                               | +                                        | +                                    | +          |
| Kao 2003       | ?                                           | ?                                       | +                                                         | +                                               | +                                        | +                                    | ?          |
| Kaspari 2001   | ?                                           | ?                                       | +                                                         | +                                               | +                                        | +                                    | ?          |
| Katz a 2003    | +                                           | +                                       | +                                                         | +                                               | +                                        | +                                    | +          |
| Katz b 2003    | +                                           | +                                       | +                                                         | +                                               | +                                        | +                                    | +          |
| Kim 2015       | +                                           | ?                                       | +                                                         | ●                                               | +                                        | +                                    | ?          |
| Kinoshita 2011 | +                                           | +                                       | +                                                         | +                                               | +                                        | +                                    | ?          |
| Kobeissy 2012  | +                                           | ?                                       | ●                                                         | ●                                               | +                                        | +                                    | +          |
| Koop 1995      | ?                                           | ?                                       | +                                                         | +                                               | +                                        | +                                    | ?          |
| Korner 2003    | +                                           | ?                                       | +                                                         | +                                               | +                                        | +                                    | +          |
| Kovacs 2002    | ?                                           | ?                                       | +                                                         | ?                                               | +                                        | +                                    | ?          |
| Kushner a 2009 | ?                                           | ?                                       | +                                                         | +                                               | +                                        | +                                    | +          |
| Kushner b 2009 | ?                                           | ?                                       | +                                                         | +                                               | +                                        | +                                    | +          |

Supplementary Figure S1c. Risk of bias summary (continued)

|                     | Random sequence generation (selection bias) | Allocation concealment (selection bias) | Blinding of participants and personnel (performance bias) | Blinding of outcome assessment (detection bias) | Incomplete outcome data (attrition bias) | Selective reporting (reporting bias) | Other bias |
|---------------------|---------------------------------------------|-----------------------------------------|-----------------------------------------------------------|-------------------------------------------------|------------------------------------------|--------------------------------------|------------|
| Laine a 2011        | +                                           | +                                       | +                                                         | +                                               | +                                        | +                                    | +          |
| Laine b 2011        | +                                           | +                                       | +                                                         | +                                               | +                                        | +                                    | +          |
| Lightdale 2006      | +                                           | +                                       | +                                                         | +                                               | +                                        | +                                    | ?          |
| Lundell 1990        | ?                                           | ?                                       | +                                                         | ?                                               | +                                        | +                                    | +          |
| Maton 1999          | ?                                           | ?                                       | +                                                         | ?                                               | +                                        | +                                    | +          |
| Mccarty Dawson 1996 | ?                                           | ?                                       | +                                                         | ?                                               | +                                        | +                                    | ?          |
| Mee 1996            | +                                           | +                                       | +                                                         | +                                               | +                                        | +                                    | +          |
| Meneghelli 2002     | +                                           | ?                                       | +                                                         | +                                               | +                                        | +                                    | +          |
| Miner 2002          | ?                                           | ?                                       | +                                                         | ?                                               | +                                        | +                                    | ?          |
| Monnikes 2007       | +                                           | +                                       | +                                                         | ?                                               | +                                        | +                                    | +          |
| Moraes Filho 2014   | +                                           | +                                       | +                                                         | +                                               | +                                        | +                                    | ?          |
| Mossner 1995        | +                                           | ?                                       | +                                                         | ?                                               | +                                        | +                                    | +          |
| Mulder 2002         | ?                                           | ?                                       | +                                                         | ?                                               | +                                        | +                                    | +          |
| Ohara 2010          | +                                           | +                                       | +                                                         | ?                                               | +                                        | +                                    | +          |
| Pace 2005           | +                                           | ?                                       | +                                                         | +                                               | +                                        | +                                    | ?          |
| Palmer 1990         | ?                                           | ?                                       | +                                                         | ?                                               | +                                        | +                                    | +          |
| Pappa a 1999        | ?                                           | ?                                       | +                                                         | ?                                               | +                                        | +                                    | +          |
| Pappa b 1999        | ?                                           | ?                                       | +                                                         | ?                                               | +                                        | +                                    | ?          |
| Paul 2001           | +                                           | ?                                       | +                                                         | ?                                               | +                                        | +                                    | ?          |
| Peura 2009          | ?                                           | ?                                       | +                                                         | ?                                               | +                                        | +                                    | ?          |
| Peura a 2014        | +                                           | +                                       | +                                                         | ?                                               | +                                        | +                                    | ?          |
| Peura b 2014        | +                                           | +                                       | +                                                         | ?                                               | +                                        | +                                    | ?          |
| Pilotto 2007        | +                                           | ?                                       | +                                                         | +                                               | +                                        | +                                    | ?          |
| Quik 1990           | ?                                           | ?                                       | +                                                         | ?                                               | +                                        | +                                    | ?          |
| Richer 1 2000       | ?                                           | ?                                       | +                                                         | ?                                               | +                                        | +                                    | ?          |



Supplementary Figure S1d. Risk of bias summary

|                 | Random sequence generation (selection bias) | Allocation concealment (selection bias) | Blinding of participants and personnel (performance bias) | Blinding of outcome assessment (detection bias) | Incomplete outcome data (attrition bias) | Selective reporting (reporting bias) | Other bias |
|-----------------|---------------------------------------------|-----------------------------------------|-----------------------------------------------------------|-------------------------------------------------|------------------------------------------|--------------------------------------|------------|
| Richer 2 2000   | ?                                           | ?                                       | +                                                         | ?                                               | +                                        | +                                    | ?          |
| Richter 1 2001  | ?                                           | ?                                       | +                                                         | +                                               | +                                        | +                                    | ?          |
| Richter 1999    | ?                                           | ?                                       | +                                                         | ?                                               | +                                        | +                                    | ?          |
| Richter 2 2001  | +                                           | +                                       | +                                                         | +                                               | +                                        | +                                    | +          |
| Riemann 1991    | ?                                           | ?                                       | +                                                         | ?                                               | ?                                        | ?                                    | ?          |
| Robinson 1991   | ?                                           | ?                                       | ?                                                         | ?                                               | +                                        | +                                    | ?          |
| Robinson 1995   | ?                                           | ?                                       | +                                                         | ?                                               | +                                        | +                                    | ?          |
| Robinson 1996   | +                                           | ?                                       | +                                                         | +                                               | +                                        | +                                    | +          |
| Roufail 1992    | ?                                           | ?                                       | +                                                         | ?                                               | +                                        | +                                    | ?          |
| Sabesan 1991    | ?                                           | ?                                       | +                                                         | ?                                               | +                                        | +                                    | ?          |
| Schmitt 2006    | +                                           | +                                       | +                                                         | +                                               | +                                        | +                                    | ?          |
| Scholten 2003   | +                                           | ?                                       | +                                                         | ?                                               | +                                        | +                                    | ?          |
| Silver 1996     | ?                                           | ?                                       | +                                                         | ?                                               | +                                        | +                                    | ?          |
| Simon 1993      | ?                                           | ?                                       | +                                                         | ?                                               | +                                        | +                                    | ?          |
| Sontag 1987     | ?                                           | ?                                       | +                                                         | ?                                               | +                                        | +                                    | +          |
| Tan 2011        | +                                           | +                                       | +                                                         | +                                               | +                                        | +                                    | +          |
| Uemura 2008     | ?                                           | ?                                       | +                                                         | ?                                               | +                                        | +                                    | ?          |
| Vantrappen 1988 | ?                                           | ?                                       | +                                                         | ?                                               | +                                        | +                                    | +          |
| Van Zyl 2000    | +                                           | ?                                       | +                                                         | +                                               | +                                        | +                                    | +          |
| Van Zyl 2004    | +                                           | ?                                       | +                                                         | ?                                               | +                                        | +                                    | +          |
| Venables 1997   | ?                                           | ?                                       | +                                                         | ?                                               | +                                        | +                                    | +          |
| Zheng 2009      | ?                                           | +                                       | ?                                                         | ?                                               | +                                        | +                                    | ?          |
